# Supplementary material for: Analysis of the Reticulon Gene Family Demonstrates the Absence of the Neurite Growth Inhibitor Nogo-A in Fish
Source: Oxford University Press journal article supplement (doi:10.1093/molbev/msi158), 2005-04-27
Supplement: msi158_Supplementary_Data.zip [file msi158_Supplementary_Data.zip]

Supplementary Table 1A: Overview of cloned zebrafish and fugu rtms

| Gene        | Transcripts        | Exons                  | Identification                            | size of identified 5'UTR (bp) | position of upstream stop codon (bp) | Kozak Consensus (gccAccATGG) | ORF (bp) | size of identified 3'UTR (bp) | position of polyA signal (bp)              | protein (aa) | pI value of N terminus | ER retention (KRKAE) |
|-------------|--------------------|------------------------|-------------------------------------------|-------------------------------|--------------------------------------|------------------------------|----------|-------------------------------|--------------------------------------------|--------------|------------------------|----------------------|
| (DANRE)rtn1 | rtn1-a1            | I(a), II, III, IV-IX   | 5'race, library screen <sup>1</sup>       | 168                           | -93 to -91                           | tccAaaATGT                   | 2304     | 1055                          | 3341-3346                                  | 767          | 4.6                    | KRKAE                |
|             | rtn1-a2            | I(a), IV-IX            | RT-PCR                                    |                               |                                      | tccAaaATGT                   | 789      |                               |                                            | 263          | 4.3                    | KRKAE                |
|             | rtn1-c             | I(c), IV-IX            | 5'race, library screen <sup>1</sup>       | 138                           | -120 to -118                         | cctAgtATGC                   | 639      | 1055                          | 1678-1681                                  | 212          | 6.2                    | KRKAE                |
| (DANRE)rtn2 | rtn2-c             | I(c), II-VII           | RT-PCR                                    | 65                            | -42 to -40                           | tccAaaATGA                   | 612      | 41                            |                                            | 203          | 9.0                    | KPKAH                |
| (DANRE)rtn3 | rtn3-a1            | I(a), III-VIII         | RT-PCR, ESTs                              | 156                           | -114 to -112                         | caaAaaATGG                   | 666      | 473                           | 1123-1128, 1168-1173                       | 221          | 5.3                    | RCKAE                |
|             | rtn3-a2            | I(a), II, III-VIII     | RT-PCR                                    |                               |                                      | caaAaaATGG                   | 711      |                               |                                            | 236          | 4.3                    | RCKAE                |
| (DANRE)rtn4 | rtn4-l             | I(l), II-VII           | 5'race, ESTs, library screen <sup>1</sup> | 206                           | -33 to -31                           | gcaAcaATGG                   | 969      | 970                           | 1771-1776, 1796-1801, 1909-1914, 1920-1925 | 322          | 4.4                    | KPKTE                |
|             | rtn4-l(-63/188)    | I(l)Δ-63/188, II-VII   | RT-PCR, ESTs, library screen <sup>1</sup> |                               |                                      | tccAcaATGC                   | 765      |                               |                                            | 254          | 4.7                    | KPKTE                |
|             | rtn4-l(-10/195)    | I(l)Δ-10/195, II-VII   | RT-PCR                                    |                               |                                      | tccAcaATGC                   | 765      |                               |                                            | 254          | 4.7                    | KPKTE                |
|             | rtn4-m             | I(m), II-VII           | 5'race                                    | 89                            | -6 to -4                             | tgaCcgATGC                   | 639      |                               |                                            | 212          | 6.3                    | KPKTE                |
|             | rtn4-n             | I(n), II-VII           | ESTs, library screen <sup>1</sup>         | 48                            | -18 to -16                           | agcGagATGG                   | 582      | 970                           | 1514-1519                                  | 193          | 6.0                    | KPKTE                |
| (DANRE)rtn5 | rtn5-a1            | I(a), II, III, IV-IX   | 5'race, library screen <sup>1</sup>       | 118                           | -51 to -53                           | gcaAgcATGT                   | 2457     | 132                           |                                            | 818          | 4.4                    | AKKKE                |
|             | rtn5-a2            | I(a), IV-IX            | RT-PCR                                    |                               |                                      | gcaAgcATGT                   | 750      |                               |                                            | 249          | 4.3                    | AKKKE                |
|             | rtn5-a1(265/1584)  | I(a), IIΔ, IIIΔ, IV-IX | RT-PCR                                    |                               |                                      | gcaAgcATGT                   | 1137     |                               |                                            | 378          | 4.9                    | AKKKE                |
|             | rtn5-a1(297/2025)  | I(a), IIIΔ, IVΔ-IX     | RT-PCR                                    |                               |                                      | gcaAgcATGT                   | 462      |                               |                                            | 153          | 4.1                    | truncated            |
|             | rtn5-a1(309/2025)  | I(a), IIIΔ, IVΔ-IX     | RT-PCR                                    |                               |                                      | gcaAgcATGT                   | 474      |                               |                                            | 157          | 4.1                    | truncated            |
|             | rtn5-a1(558/1048)  | I(a), IIΔ, III, IV-IX  | RT-PCR                                    |                               |                                      | gcaAgcATGT                   | 678      |                               |                                            | 225          | 4.2                    | truncated            |
|             | rtn5-c             | I(c), IV-IX            | library screen <sup>1</sup>               | 175                           | -75 to -73                           | acaGacATGG                   | 612      | 132                           |                                            | 203          | 9.0                    | AKKKE                |
| (DANRE)rtn6 | rtn6-a1            | I(a), II, III, IV-IX   | ESTs, library screen <sup>1</sup>         | 284                           | -102 to -100                         | ctcCcgATGG                   | 2628     | 321                           | 2927-2932                                  | 875          | 3.9                    | KKKSD                |
|             | rtn6-a2            | I(a), II, IV-IX        | RT-PCR                                    |                               |                                      | ctcCcgATGG                   | 1569     |                               |                                            | 522          | 3.8                    | KKKSD                |
|             | rtn6-a3            | I(a), III, IV-IX       | ESTs                                      |                               |                                      | ctcCcgATGG                   | 2583     |                               |                                            | 860          | 3.8                    | KKKSD                |
|             | rtn6-a1(337/555)   | I(a)Δ, II, III, IV-IX  | EST                                       |                               |                                      | ctcCcgATGG                   | 2409     |                               |                                            | 802          | 3.9                    | KKKSD                |
|             | rtn6-a1(1576/1860) | I(a), II, IIIΔ, IV-IX  | RT-PCR                                    |                               |                                      | ctcCcgATGG                   | 2343     |                               |                                            | 780          | 3.8                    | KKKSD                |
|             | rtn6-a1(1761/2150) | I(a), II, IIIΔ, IVΔ-IX | RT-PCR                                    |                               |                                      | ctcCcgATGG                   | 2238     |                               |                                            | 745          | 3.9                    | KKKSD                |
|             | rtn6-a1(1773/2152) | I(a), II, IIIΔ, IVΔ-IX | RT-PCR                                    |                               |                                      | ctcCcgATGG                   | 1926     |                               |                                            | 641          | 3.9                    | truncated            |
|             | rtn6-a1(1774/2212) | I(a), II, IIIΔ, IVΔ-IX | RT-PCR                                    |                               |                                      | ctcCcgATGG                   | 1968     |                               |                                            | 655          | 3.9                    | truncated            |
|             | rtn6-a1(1775/2140) | I(a), II, IIIΔ, IVΔ-IX | RT-PCR                                    |                               |                                      | ctcCcgATGG                   | 2262     |                               |                                            | 753          | 3.9                    | KKKSD                |
|             | rtn6-a1(1775/2152) | I(a), II, IIIΔ, IVΔ-IX | RT-PCR                                    |                               |                                      | ctcCcgATGG                   | 2250     |                               |                                            | 749          | 3.9                    | KKKSD                |
|             | rtn6-a1(1775/2344) | I(a), II, IIIΔ, VΔ-IX  | RT-PCR                                    |                               |                                      | ctcCcgATGG                   | 2058     |                               |                                            | 685          | 3.9                    | KKKSD                |
|             | rtn6-a1(1777/1956) | I(a), II, IIIΔ, IV-IX  | RT-PCR                                    |                               |                                      | ctcCcgATGG                   | 2448     |                               |                                            | 815          | 3.9                    | KKKSD                |
| (DANRE)rtn8 | rtn8-a1(2023/2173) | I(a), II, IIIΔ, IVΔ-IX | RT-PCR                                    |                               |                                      | ctcCcgATGG                   | 2043     |                               |                                            | 680          | 3.9                    | truncated            |
| (DANRE)rtn8 | rtn8-c             | I(c), II-VII           | 5'race, RT-PCR, EST                       | 53                            | -36 to -34                           | gcaGaaATGG                   | 627      | 213                           |                                            | 208          | 9.0                    | KQKTK                |

| Gene        | Transcripts | Exons                | Identification  | size of identified 5'UTR (bp) | position of upstream stop codon (bp) | Kozak Consensus (gccAccATGG) | ORF (bp) | size of identified 3'UTR (bp) | position of polyA signal (bp) | protein (aa) | pI value of N terminus | ER retention (KRKAE) |
|-------------|-------------|----------------------|-----------------|-------------------------------|--------------------------------------|------------------------------|----------|-------------------------------|-------------------------------|--------------|------------------------|----------------------|
| (FUGRU)rtn1 | rtn1-a1     | I(a), II, III, IV-IX | RT-PCR          | 16                            | -6 to -4                             | tagAccATGT                   | 2190     | 32                            |                               | 729          | 4.3                    | KRKEE                |
| (FUGRU)rtn2 | rtn2-c      | I(c), II-VII         | genomic, 3'race |                               |                                      | actAaaaATGG                  | 612      | 277                           |                               | 203          | 9.0                    | KPKNQ                |
| (FUGRU)rtn3 | rtn3-a1     | I(c), II-VII         | RT-PCR          | 72                            | -15 to +13                           | aatAcaaATGG                  | 663      | 18                            |                               | 220          | 5.5                    | SNKTE                |
| (FUGRU)rtn4 | rtn4-l1     | I(l), IV-IX          | RT-PCR, ESTs    | 210                           | -73 to -75                           | acgAaaaATGG                  | 1029     | 28                            |                               | 342          | 4.0                    | KRKTE                |
|             | rtn4-l2     | I(l), II, IV-IX      | RT-PCR          |                               |                                      | acgAaaaATGG                  | 1068     |                               |                               | 355          | 4.1                    | KRKTE                |
|             | rtn4-l3     | I(l), III, IV-IX     | RT-PCR          |                               |                                      | acgAaaaATGG                  | 1083     |                               |                               | 360          | 4.0                    | KRKTE                |
|             | rtn4-n      | I(n), IV-IX          | RT-PCR, ESTs    | 17                            |                                      | ttcAagATGG                   | 682      | 44                            |                               | 193          | 9.0                    | KRKTE                |
| (FUGRU)rtn7 |             | IIa, IIb, III-VII    | genomic         |                               |                                      |                              |          |                               |                               |              |                        | KVKAE                |
| (FUGRU)rtn8 | rtn8-c      | I(c), II-VII         | RT-PCR, ESTs    | 76                            | -43 to -45                           | gctGaaATGG                   | 645      | 32                            |                               | 214          | 9.0                    | KAKAK                |

<sup>1</sup>Library screening was performed at the RZPD (Deutsches Ressourcenzentrum für Genomforschung GmbH, Heidelberg Germany) and for the different zebrafish rtn genes, the following clones were identified:

- rtn1: embryo library:  
brain library:

ICRFp524P16147Q8  
UCDMp61IH0866Q2, UCDMp61IK0437Q2, UCDMp61IL1236Q2, UCDMp61IC245Q2, UCDMp61IE0247Q2, UCDMp61IH01100Q2, UCDMp61ID2082Q2, UCDMp61IL0217Q2, UCDMp61IM1391Q2, UCDMp61IB10104Q2, UCDMp61IM2385Q2, UCDMp61IF1912Q2, UCDMp61IBF2122Q2, UCDMp61IM1173Q2
- rtn4: embryo library:

ICRFp524H2158Q8, ICRFp524N0372Q8, ICRFp524M15145Q8, ICRFp524E1950Q8, ICRFp524J2089Q8, ICRFp524M03107Q8, ICRFp524N1146Q8, ICRFp524O2163Q1, ICRFp524G20163Q8, ICRFp524N15110Q8, ICRFp524O0124Q8, ICRFp524K10135Q8
- retina library:

UWS\_p760C0818Q2, UWS\_p760F0665Q2, UWS\_p760G2345Q2, UWS\_p760N0712Q2
- rtn5: retina library:

UWS\_p760O115Q2
- rtn6: embryo library:

ICRFp524L08126Q8, ICRFp524L08126Q8, ICRFp524A0107Q8
- brain library:

UCDMp61IB22132Q2

**Supplementary Table 1B: Primer used for RT-PCR and RDH mapping**

| <b>(DANRE)rtn1</b> |                                       |                                           |
|--------------------|---------------------------------------|-------------------------------------------|
| <b>No</b>          | <b>Sequence</b>                       | <b>Project</b>                            |
| 1                  | GTC TAA ATA AAC TGG AAG TTG CTG AGA C | RDH mapping sense primer                  |
| 2                  | CAT GGG ACA GTG ACA TCT CCA CAT CC    | RDH mapping antisense primer              |
| 3                  | GAA AAG ATG TCC ACC ATG               | RT-PCR sense primer (-a1 splice form)     |
| 4                  | ATA AGA GCT CCA ACA TAG G             | RT-PCR antisense primer (-a1 splice form) |
| 5                  | ATG CAG GCC AGC ACC ATG               | RT-PCR sense primer (-c splice form)      |
| 2                  | CAT GGG ACA GTG ACA TCT CCA CAT CC    | RT-PCR antisense primer (-c splice form)  |

| <b>(DANRE)rtn2</b> |                         |                                         |
|--------------------|-------------------------|-----------------------------------------|
| <b>No</b>          | <b>Sequence</b>         | <b>Project</b>                          |
| 6                  | GGG TTT CAG AGA TCA GG  | RDH mapping sense primer                |
| 7                  | ACT GCT ATG TGG GAC TTC | RDH mapping antisense primer            |
| 8                  | CGG TCC ATG AAG ACT C   | RT-PCR sense primer (c splice form)     |
| 9                  | GAG TGA CAG CGC ATG G   | RT-PCR antisense primer (c splice form) |

| <b>(DANRE)rtn3</b> |                                    |                                                    |
|--------------------|------------------------------------|----------------------------------------------------|
| <b>No</b>          | <b>Sequence</b>                    | <b>Project</b>                                     |
| 10                 | GCT CTT CAG TGT ACC GCC CAT CTA TG | RDH mapping sense primer                           |
| 11                 | GCC ATT GAG ACA CCG CGG ACA CC     | RDH mapping antisense primer                       |
| 12                 | ATG GCA GAC CCA ATG ACC            | RT-PCR sense primer (-a1 and -a2 splice forms)     |
| 13                 | GGA TCA TTC TGC TTT ACA GC         | RT-PCR antisense primer (-a1 and -a2 splice forms) |

| <b>(DANRE)rtn4</b> |                                       |                                                      |
|--------------------|---------------------------------------|------------------------------------------------------|
| <b>No</b>          | <b>Sequence</b>                       | <b>Project</b>                                       |
| 14                 | ATG GAT GAT CAA ATA AGC TC            | RDH mapping sense primer                             |
| 15                 | GTT ACA TTT ATA TGG CGC TAC TGT TGG C | RDH mapping antisense primer                         |
| 14                 | ATG GAT GAT CAA ATA AGC TC            | RT-PCR sense primer (-l splice form)                 |
| 16                 | CCT GAC TGG ATA TAT GAC C             | RT-PCR sense primer (-m splice form)                 |
| 17                 | ATG AGC GAG ATG GAT TCC               | RT-PCR sense primer (-n splice form)                 |
| 18                 | GAA ATG AAT CCA AAT GGC C             | RT-PCR antisense primer (-l, -m and -n splice forms) |

| <b>(DANRE)rtn5</b> |                                     |                                                     |
|--------------------|-------------------------------------|-----------------------------------------------------|
| <b>No</b>          | <b>Sequence</b>                     | <b>Project</b>                                      |
| 19                 | GTT TGG CAG TGT GCT GCT GCT C       | RDH mapping sense primer                            |
| 20                 | GGA ATC GTG ACT ATT CCA GTT TCG CGC | RDH mapping antisense primer                        |
| 21                 | TGA GGA TGA AGA TGA CAT CC          | RT-PCR sense primer (-a1 splice form)               |
| 22                 | GGT TAA AGA GAA GAG CAG C           | RT-PCR antisense primer (-a1 splice form)           |
| 23                 | GGC TGA TCT GTC CTT GC              | RT-PCR sense primer (-a1/b splice form)             |
| 24                 | ATG GAT AAA GGG AAG AAA GAG         | RT-PCR sense primer (-c splice form)                |
| 25                 | GAA GTG AAG AGT TTA TTC CTT C       | RT-PCR antisense primer (-a1/b and -c splice forms) |

| <b>(DANRE)rtn6</b> |                                |                                              |
|--------------------|--------------------------------|----------------------------------------------|
| <b>No</b>          | <b>Sequence</b>                | <b>Project</b>                               |
| 26                 | TGC TGC AGC TGC TGT ACT GGC G  | RDH mapping sense primer                     |
| 27                 | GCA TGG CCT GTA GCA CCG CCG TG | RDH mapping antisense primer                 |
| 28                 | AAA AGC AGG TGC AGC AG         | RT-PCR sense primer (-a1/a3 splice form)     |
| 29                 | ACT GCC AAC TTC AGC GAG        | RT-PCR antisense primer (-a1/a3 splice form) |

| <b>(DANRE)rtn8</b> |                            |                               |
|--------------------|----------------------------|-------------------------------|
| <b>No</b>          | <b>Sequence</b>            | <b>Project</b>                |
| 30                 | GGA TCT GAT ATA CTG GCG    | RDH mapping sense primer      |
| 31                 | TTC CTG TTG TTA CAG TTA CC | RDH mapping antisense primer  |
| 30                 | GGA TCT GAT ATA CTG GCG    | RT-PCR sense primer (RHD)     |
| 32                 | GTG AGC TCC ACA TTT CTC    | RT-PCR antisense primer (RHD) |

| <b>Actin</b> |                                 |                         |
|--------------|---------------------------------|-------------------------|
| <b>No</b>    | <b>Sequence</b>                 | <b>Project</b>          |
| 33           | GCT CAC CAT GGA TGA TGA TAT CGC | RT-PCR sense primer     |
| 34           | GGA GGA GCA ATG ATC TTG ATC TTC | RT-PCR antisense primer |

**Supplementary Table 1C: RT-PCR conditions**

| <b>(DANRE)rtn1</b> |                  |                 |                 |                  |                      |
|--------------------|------------------|-----------------|-----------------|------------------|----------------------|
| Primer sense       | Primer antisense | Annealing Temp. | Elongation Time | Number of Cycles | Ampified Splice Form |
| 3                  | 4                | 51 °C           | 35 sec          | 35               | (DANRE)rtn1-a1       |
| 5                  | 2                | 59 °C           | 30 sec          | 35               | (DANRE)rtn1-c        |

| <b>(DANRE)rtn2</b> |                  |                 |                 |                  |                      |
|--------------------|------------------|-----------------|-----------------|------------------|----------------------|
| Primer sense       | Primer antisense | Annealing Temp. | Elongation Time | Number of Cycles | Ampified Splice Form |
| 8                  | 9                | 54 °C           | 45 sec          | 35               | (DANRE)rtn2-c        |

| <b>(DANRE)rtn3</b> |                  |                 |                 |                  |                        |
|--------------------|------------------|-----------------|-----------------|------------------|------------------------|
| Primer sense       | Primer antisense | Annealing Temp. | Elongation Time | Number of Cycles | Ampified Splice Form   |
| 12                 | 13               | 58 °C           | 45 sec          | 35               | (DANRE)rtn3-a1 and -a2 |

| <b>(DANRE)rtn4</b> |                  |                 |                 |                  |                      |
|--------------------|------------------|-----------------|-----------------|------------------|----------------------|
| Primer sense       | Primer antisense | Annealing Temp. | Elongation Time | Number of Cycles | Ampified Splice Form |
| 14                 | 18               | 56 °C           | 90 sec          | 35               | (DANRE)rtn4-l        |
| 16                 | 18               | 60 °C           | 40 sec          | 35               | (DANRE)rtn4-m        |
| 17                 | 18               | 59 °C           | 70 sec          | 35               | (DANRE)rtn4-n        |

| <b>(DANRE)rtn5</b> |                  |                 |                 |                  |                      |
|--------------------|------------------|-----------------|-----------------|------------------|----------------------|
| Primer sense       | Primer antisense | Annealing Temp. | Elongation Time | Number of Cycles | Ampified Splice Form |
| 21                 | 22               | 58 °C           | 120 sec         | 35               | (DANRE)rtn5-a1       |
| 23                 | 25               | 60 °C           | 50 sec          | 35               | (DANRE)rtn5-a1/b     |
| 24                 | 25               | 55 °C           | 45 sec          | 35               | (DANRE)rtn5-c        |

| <b>(DANRE)rtn6</b> |                  |                 |                 |                  |                      |
|--------------------|------------------|-----------------|-----------------|------------------|----------------------|
| Primer sense       | Primer antisense | Annealing Temp. | Elongation Time | Number of Cycles | Ampified Splice Form |
| 28                 | 29               | 63 °C           | 60 sec          | 35               | (DANRE)rtn6-a1       |

| <b>(DANRE)rtn8</b> |                  |                 |                 |                  |                      |
|--------------------|------------------|-----------------|-----------------|------------------|----------------------|
| Primer sense       | Primer antisense | Annealing Temp. | Elongation Time | Number of Cycles | Ampified Splice Form |
| 30                 | 32               | 59 °C           | 20 sec          | 35               | (DANRE)rtn8-RHD      |

| <b>Actin</b> |                  |                 |                 |                  |                      |
|--------------|------------------|-----------------|-----------------|------------------|----------------------|
| Primer sense | Primer antisense | Annealing Temp. | Elongation Time | Number of Cycles | Ampified Splice Form |
| 33           | 34               | 50 °C           | 90 sec          | 25               | (DANRE)Actin         |

Supplementary Table 1D: GeneBank accession numbers of vertebrate rtn genes

| Chordate RTN subfamily |                         |                    |                                                  |                                                                                        |                                                                  |             |
|------------------------|-------------------------|--------------------|--------------------------------------------------|----------------------------------------------------------------------------------------|------------------------------------------------------------------|-------------|
| Urochordate RTN        |                         |                    |                                                  |                                                                                        |                                                                  |             |
| Species                | Gene                    | Transcript         | GenBank Accession for newly identified RTN Genes | GenBank Accession for previously identified RTN Genes <sup>a</sup>                     | Published                                                        |             |
|                        |                         |                    |                                                  |                                                                                        |                                                                  |             |
| Ciona intestinalis     | (CIOIN)RTN              |                    |                                                  | <a href="#">BK001680</a> (AY164660)                                                    | 24                                                               |             |
|                        |                         |                    |                                                  | <a href="#">BK001675</a> (AY164756)                                                    | 24                                                               |             |
|                        |                         |                    |                                                  | <a href="#">BK001674</a> (AY164755)                                                    | 24                                                               |             |
|                        |                         |                    |                                                  | <a href="#">BK001678</a> (AY164757)                                                    | 24                                                               |             |
|                        |                         |                    |                                                  | <a href="#">BK001677</a> (AY164760)                                                    | 24                                                               |             |
|                        |                         |                    |                                                  | <a href="#">BK001676</a> (AY164759)                                                    | 24                                                               |             |
|                        |                         |                    |                                                  | <a href="#">BK001679</a> (AY164758)                                                    | 24                                                               |             |
|                        |                         |                    |                                                  |                                                                                        |                                                                  |             |
| Vertebrate RTN         |                         |                    |                                                  |                                                                                        |                                                                  |             |
| Species                | Gene                    | Transcript         | GenBank Accession for newly identified RTN Genes | GenBank Accession for previously identified RTN Genes                                  | Published                                                        |             |
| Homo sapiens           | (HUMAN)RTN1             |                    |                                                  | NT_025892, <a href="#">AY164662</a>                                                    | 1, 2, 24                                                         |             |
|                        |                         |                    |                                                  | L10333, NM_021136.1                                                                    | 3                                                                |             |
|                        |                         |                    |                                                  | L10334                                                                                 | 3                                                                |             |
|                        | (HUMAN)RTN1-C           |                    |                                                  | L10335, BC003003                                                                       | 3                                                                |             |
|                        |                         | (HUMAN)RTN2        |                                                  |                                                                                        | NT_011109, <a href="#">AY164661</a>                              | 4           |
|                        |                         |                    |                                                  |                                                                                        | BK001687 AF004222, ( <a href="#">AY164714</a> )                  | 4, 24       |
|                        |                         |                    |                                                  | <a href="#">BK001690</a> (AY164717)                                                    | 24                                                               |             |
|                        |                         |                    |                                                  | <a href="#">BK001688</a> (AY164715)                                                    | 4, 24                                                            |             |
|                        |                         |                    |                                                  | <a href="#">BK001691</a> (AY164718)                                                    | 24                                                               |             |
|                        |                         |                    |                                                  | BK001686 AF004224, ( <a href="#">AY164713</a> )                                        | 4, 24                                                            |             |
|                        |                         |                    |                                                  | <a href="#">BK001689</a> (AY164716)                                                    | 24                                                               |             |
|                        | (HUMAN)RTN3             |                    |                                                  | NT_033241; NT_009984 (m)                                                               | 5                                                                |             |
|                        |                         |                    |                                                  | BK001681 NM_006054, AF059524, ( <a href="#">AY164701</a> )                             | 5, 24                                                            |             |
|                        |                         |                    |                                                  | <a href="#">BK001684</a> (AY164704)                                                    | 24                                                               |             |
|                        | (HUMAN)RTN3-A3 (e)      |                    |                                                  | <a href="#">BK001683</a> (AY164703)                                                    | 24                                                               |             |
|                        |                         |                    |                                                  | <a href="#">BK001682</a> (AY164702)                                                    | 24                                                               |             |
|                        |                         |                    |                                                  | <a href="#">BK001685</a> (AY164705)                                                    | 24                                                               |             |
|                        |                         | (HUMAN)RTN3-Δ8 (e) |                                                  |                                                                                        | <a href="#">BK001696</a>                                         |             |
|                        |                         |                    |                                                  |                                                                                        | NT_016606                                                        | 5           |
|                        |                         |                    |                                                  |                                                                                        | <a href="#">AY102285</a>                                         | 6, 7, 8     |
|                        |                         | (HUMAN)RTN4        |                                                  |                                                                                        | <a href="#">AY102279</a> , AB020693, AB040462, AF148537          | 6, 7, 9, 10 |
|                        |                         |                    |                                                  | <a href="#">AY123245</a>                                                               | 6                                                                |             |
|                        |                         |                    |                                                  | <a href="#">AY123246</a>                                                               | 6                                                                |             |
|                        |                         |                    |                                                  | <a href="#">AY102277</a> , AB015639, AF132047, AF148538                                | 6, 9, 10                                                         |             |
|                        |                         |                    |                                                  | <a href="#">AY102278</a>                                                               | 6                                                                |             |
|                        |                         |                    |                                                  | <a href="#">AY102276</a> , AF077050, AF087901                                          | 6, 9, 10, 11                                                     |             |
|                        |                         |                    |                                                  | <a href="#">AY123247</a>                                                               | 6                                                                |             |
|                        |                         |                    |                                                  | <a href="#">AY123248</a> , AF333336                                                    | 6, 12                                                            |             |
|                        |                         |                    |                                                  | <a href="#">AY123249</a>                                                               | 6                                                                |             |
|                        |                         |                    |                                                  | <a href="#">AY123250</a>                                                               | 6                                                                |             |
|                        | Pan troglodytes         | (PANTR)RTN1        |                                                  |                                                                                        |                                                                  |             |
|                        |                         |                    | (PANTR)RTN1w                                     | <a href="#">BK003953</a>                                                               |                                                                  | 24          |
|                        |                         | (PANTR)RTN3        |                                                  |                                                                                        |                                                                  |             |
|                        |                         |                    | (PANTR)RTN3-A1                                   | <a href="#">BK003954</a>                                                               |                                                                  | 24          |
|                        | (PANTR)RTN4             |                    |                                                  |                                                                                        |                                                                  |             |
|                        |                         | (PANTR)RTN4-C      | <a href="#">BK001700</a>                         |                                                                                        | 24                                                               |             |
|                        |                         |                    |                                                  |                                                                                        |                                                                  |             |
|                        | Ateles belzebuth chamek | (ATEBE)RTN1        |                                                  |                                                                                        | <a href="#">BK001692</a> AF029167, ( <a href="#">AY164729</a> )  | 24          |
|                        |                         |                    | (ATEBE)RTN1-Aw                                   |                                                                                        |                                                                  |             |
|                        |                         |                    |                                                  |                                                                                        |                                                                  |             |
|                        | Macaca mulatta          | (MACMU)RTN1        |                                                  |                                                                                        |                                                                  |             |
|                        |                         |                    | (MACMU)RTN1-Cw                                   | <a href="#">BK001697</a>                                                               |                                                                  | 24          |
| (MACMU)RTN3            |                         |                    |                                                  |                                                                                        |                                                                  |             |
|                        |                         | (MACMU)RTN3w       | <a href="#">BK003957</a>                         |                                                                                        | 24                                                               |             |
| (MACMU)RTN4            |                         |                    |                                                  |                                                                                        |                                                                  |             |
| (MACMU)RTN4-Cw (Part1) |                         |                    | <a href="#">BK003948</a>                         | 24                                                                                     |                                                                  |             |
|                        | (MACMU)RTN4-Cw (Part2)  |                    |                                                  | <a href="#">BK003949</a>                                                               | 24                                                               |             |
|                        |                         |                    |                                                  |                                                                                        |                                                                  |             |
| Macaca fascicularis    | (MACFA)RTN4             |                    |                                                  |                                                                                        |                                                                  |             |
|                        |                         | (MACFA)RTN4-Aw     |                                                  |                                                                                        | 13                                                               |             |
|                        |                         | (MACFA)RTN4-C      |                                                  | <a href="#">BK001695</a> AB049853, ( <a href="#">AY164742</a> )                        | 24                                                               |             |
|                        |                         |                    |                                                  |                                                                                        |                                                                  |             |
| Mus musculus           | (MOUSE)Rtn1             |                    |                                                  | NW_000053                                                                              |                                                                  |             |
|                        |                         |                    |                                                  | BK001694 AB074899, BC030455, ( <a href="#">AY164731</a> )                              | 24                                                               |             |
|                        |                         |                    |                                                  | <a href="#">BK001698</a>                                                               | 24                                                               |             |
|                        |                         |                    |                                                  | <a href="#">BK001693</a> , AK002997, AK014358, XM_127007, ( <a href="#">AY164730</a> ) | 24                                                               |             |
|                        | (MOUSE)Rtn1-d           |                    |                                                  | <a href="#">BK001699</a>                                                               | 24                                                               |             |
|                        |                         |                    |                                                  |                                                                                        | 14, 15                                                           |             |
|                        |                         | (MOUSE)Rtn2-b      |                                                  |                                                                                        | <a href="#">BK001789</a> NM_013648, ( <a href="#">AY164711</a> ) | 14, 24      |
|                        |                         |                    |                                                  |                                                                                        | <a href="#">BK001790</a> NM_013648, ( <a href="#">AY164712</a> ) | 14, 24      |
|                        | (MOUSE)Rtn3             |                    |                                                  | NW_000139                                                                              | 16                                                               |             |
|                        |                         |                    |                                                  | NM_053076, <a href="#">AY164700</a>                                                    | 24                                                               |             |
|                        |                         |                    |                                                  | <a href="#">BK001796</a> (AY164699)                                                    | 24                                                               |             |
|                        |                         |                    |                                                  | <a href="#">BK003955</a>                                                               | 24                                                               |             |
|                        | (MOUSE)Rtn4             |                    |                                                  | <a href="#">AY102286</a> , NW_000035                                                   | 6                                                                |             |
|                        |                         |                    |                                                  | <a href="#">AY102284</a>                                                               | 6                                                                |             |
|                        |                         |                    |                                                  | <a href="#">AY102281</a>                                                               | 6                                                                |             |
|                        |                         |                    |                                                  | <a href="#">AY102282</a>                                                               | 6                                                                |             |
|                        |                         |                    | <a href="#">AY102283</a> , NM_024226             | 6                                                                                      |                                                                  |             |
|                        |                         |                    | <a href="#">AY102280</a>                         | 6                                                                                      |                                                                  |             |
|                        |                         |                    |                                                  |                                                                                        |                                                                  |             |
|                        |                         |                    |                                                  |                                                                                        |                                                                  |             |
|                        |                         |                    |                                                  |                                                                                        |                                                                  |             |
| Rattus norvegicus      | (RAT)Rtn1               |                    |                                                  |                                                                                        |                                                                  |             |
|                        |                         |                    |                                                  | NM_053865.1, U17604, <a href="#">AY164728</a>                                          | 17, 18, 24                                                       |             |
|                        |                         |                    |                                                  | U17603, X52817, <a href="#">AY164727</a>                                               | 17, 18, 19, 24                                                   |             |
|                        |                         |                    |                                                  |                                                                                        |                                                                  |             |
|                        | (RAT)Rtn2               |                    |                                                  | <a href="#">BK001788</a> (AY164710)                                                    | 24                                                               |             |
|                        |                         | (RAT)Rtn2-B        |                                                  |                                                                                        |                                                                  |             |
|                        | (RAT)Rtn3               |                    |                                                  | <a href="#">AY164698</a>                                                               | 24                                                               |             |
|                        |                         | (RAT)Rtn3-a1       |                                                  |                                                                                        |                                                                  |             |
|                        | (RAT)Rtn4               |                    |                                                  | AJ242961                                                                               | 20                                                               |             |
|                        |                         |                    |                                                  | AJ242962, AF132046, <a href="#">AY164740</a>                                           | 20, 24                                                           |             |
|                        |                         |                    |                                                  | AF132045, <a href="#">AY164741</a>                                                     | 24                                                               |             |
|                        |                         |                    |                                                  | AJ242963, AF051335                                                                     | 11, 20                                                           |             |
|                        |                         |                    |                                                  |                                                                                        |                                                                  |             |
|                        |                         |                    |                                                  |                                                                                        |                                                                  |             |
|                        |                         |                    |                                                  |                                                                                        |                                                                  |             |
| Bos taurus             | (BOVIN)RTN1             |                    |                                                  |                                                                                        |                                                                  |             |
|                        |                         |                    |                                                  | <a href="#">AY164734</a>                                                               | 24                                                               |             |
|                        |                         |                    |                                                  | <a href="#">BK003967</a>                                                               | 24                                                               |             |
|                        |                         |                    |                                                  | <a href="#">BK003968</a>                                                               | 24                                                               |             |
|                        | (BOVIN)RTN2             |                    |                                                  |                                                                                        |                                                                  |             |
|                        |                         |                    |                                                  | <a href="#">BK001798</a>                                                               | 24                                                               |             |
|                        | (BOVIN)RTN2-C           |                    |                                                  | <a href="#">BK001791</a> (AY164719)                                                    | 24                                                               |             |
|                        |                         | (BOVIN)RTN3        |                                                  |                                                                                        | <a href="#">BK001797</a> (AY164707)                              | 24          |
| (BOVIN)RTN4            |                         |                    |                                                  |                                                                                        |                                                                  |             |
|                        | (BOVIN)RTN4-C           |                    |                                                  | <a href="#">AY164744</a>                                                               | 21, 24                                                           |             |
|                        |                         |                    |                                                  |                                                                                        |                                                                  |             |
| Sus scrofa             | (PIG)RTN1               |                    |                                                  |                                                                                        |                                                                  |             |
|                        |                         |                    |                                                  | <a href="#">BK001792</a> (AY164726)                                                    | 24                                                               |             |
|                        |                         |                    |                                                  |                                                                                        |                                                                  |             |
| (PIG)RTN2              |                         |                    |                                                  |                                                                                        |                                                                  |             |
|                        |                         |                    | <a href="#">BK001798</a> (AY164709)              | 24                                                                                     |                                                                  |             |

|                     |               |                          |          |                     |        |
|---------------------|---------------|--------------------------|----------|---------------------|--------|
|                     | (PIG)RTN3     | (PIG)RTN2-C              |          | BK001787 (AY164708) | 24     |
|                     |               | (PIG)RTN3-A1             | BK003952 |                     | 24     |
|                     | (PIG)RTN4     |                          |          |                     |        |
|                     |               | (PIG)RTN4-Aw             |          | AY164739            | 24     |
|                     |               | (PIG)RTN4-Aw (Part1)     |          | BK003964            | 24     |
|                     |               | (PIG)RTN4-Aw (Part2)     |          | BK003965            | 24     |
|                     |               | (PIG)RTN4-Aw (Part3)     |          | BK003966            | 24     |
|                     |               | (PIG)RTN4-C              |          | BK001795 (AY164739) | 24     |
| Canis familiaris    | (CANFA)RTN1   |                          |          |                     |        |
|                     |               | (CANFA)RTN1-Aw           |          | BK001794 (AY164733) | 24     |
|                     |               | (CANFA)RTN1-C            |          | BK001793 (AY164732) | 24     |
|                     | (CANFA)RTN3   |                          |          |                     |        |
|                     |               | (CANFA)RTN3w             |          | AY164706            | 24     |
|                     |               | (CANFA)RTN3w (Part1)     |          | BK003961            | 24     |
|                     |               | (CANFA)RTN3w (Part2)     |          | BK003962            | 24     |
|                     |               | (CANFA)RTN3w (Part3)     |          | BK003963            | 24     |
|                     | (CANFA)RTN4   |                          |          |                     |        |
|                     |               | (CANFA)RTN4-Cw           |          | AY164743            | 24     |
|                     |               | (CANFA)RTN4-Cw (Part1)   |          | BK003959            | 24     |
|                     |               | (CANFA)RTN4-Cw (Part2)   |          | BK003960            | 24     |
| Capra hircus        | (CAPHI)RTN3   |                          |          |                     |        |
|                     |               | (CAPHI)RTN3w (Part1)     | BK003950 |                     | 24     |
|                     |               | (CAPHI)RTN3w (Part2)     | BK003951 |                     | 24     |
| Ovis aries          | (SHEEP)RTN3   |                          |          |                     |        |
|                     |               | (SHEEP)RTN3-A1w          | BK003956 |                     | 24     |
|                     | (SHEEP)RTN4   |                          |          |                     |        |
|                     |               | (SHEEP)RTN4w             | BK003958 |                     | 24     |
| Gallus gallus       | (CHICK)RTN1   |                          |          |                     |        |
|                     |               | (CHICK)RTN1-A            | AY164724 | U17606, AY164724    | 18, 24 |
|                     |               | (CHICK)RTN1-C            | AY164723 | U17605, AY164723    | 18, 24 |
|                     | (CHICK)RTN3   |                          |          |                     |        |
|                     |               | (CHICK)RTN3w             | BK044006 | (AY164697)          | 24     |
|                     | (CHICK)RTN4   |                          |          |                     |        |
|                     |               | (CHICK)RTN4-Aw           |          |                     | 22     |
|                     |               | (CHICK)RTN4-B1           | BK004061 |                     | 24     |
|                     |               | (CHICK)RTN4-B2           | BK004062 |                     | 24     |
|                     |               | (CHICK)RTN4-C            | AY164737 | AY164737            | 22, 24 |
| Columba livia       | (COLLI)RTN1   |                          |          |                     |        |
|                     |               | (COLLI)RTN1w             |          | BK004009 (AY164725) | 24     |
| Xenopus laevis      | (XENLA)RTN1.1 |                          |          |                     |        |
|                     |               | (XENLA)RTN1.1-C          |          | BK004007 (AY164721) | 24     |
|                     | (XENLA)RTN1.2 |                          |          |                     |        |
|                     |               | (XENLA)RTN1.2-C          | BK004058 |                     | 24     |
|                     | (XENLA)RTN2   |                          |          |                     |        |
|                     |               | (XENLA)RTN2-A            | BK004978 |                     | 24     |
|                     |               | (XENLA)RTN2-C            | BK004977 |                     | 24     |
|                     | (XENLA)RTN3.1 |                          |          |                     |        |
|                     |               | (XENLA)RTN3.1            |          | BK004012 (AY164749) | 24     |
|                     | (XENLA)RTN3.2 |                          |          |                     |        |
|                     |               | (XENLA)RTN3.2            | BK004057 |                     | 24     |
|                     | (XENLA)RTN4-1 |                          |          |                     |        |
|                     |               | (XENLA)RTN4.1-A1         |          | AY316197            | 23     |
|                     |               | (XENLA)RTN4.1-A2         |          | AY316196            | 23     |
|                     |               | (XENLA)RTN4.1-A3         |          | AY316195            | 23     |
|                     |               | (XENLA)RTN4.1-B1         |          | AY316194            | 23     |
|                     |               | (XENLA)RTN4.1-B2         |          | AY316193            | 23     |
|                     |               | (XENLA)RTN4.1-C          |          | AY316192            | 23     |
|                     |               | (XENLA)RTN4.1-N          |          | AY316191            | 23     |
|                     | (XENLA)RTN4-2 |                          |          |                     |        |
|                     |               | (XENLA)RTN4.2-A1         |          | AY316190            | 23     |
|                     |               | (XENLA)RTN4.2-A2         |          | AY316189            | 23     |
|                     |               | (XENLA)RTN4.2-A3         |          | AY316188            | 23     |
|                     |               | (XENLA)RTN4.2-B1         |          | AY316187            | 23     |
|                     |               | (XENLA)RTN4.2-B2         |          | AY316186            | 23     |
|                     |               | (XENLA)RTN4.2-B3         |          | AY316185            | 23     |
|                     |               | (XENLA)RTN4.2-C          |          | AY316184            | 23     |
|                     |               | (XENLA)RTN4.2-N          |          | AY316183            | 23     |
| Silurana tropicalis | (XENTR)RTN1   |                          |          |                     |        |
|                     |               | (XENTR)RTN1-Aw           |          | BK004008 (AY164722) | 24     |
|                     | (XENTR)RTN2   |                          |          |                     |        |
|                     |               | (XENTR)RTN2-A            | BK005003 |                     | 24     |
|                     |               | (XENTR)RTN2-C            | BK005002 |                     | 24     |
|                     | (XENTR)RTN3   |                          |          |                     |        |
|                     |               | (XENTR)RTN3              |          | BK004013 (AY164750) | 24     |
|                     | (XENTR)RTN4   |                          |          |                     |        |
|                     |               | (XENTR)RTN4-A1w (Part1)  | BK004063 |                     | 24     |
|                     |               | (XENTR)RTN4-A1w (Part2)  | BK004064 |                     | 24     |
|                     |               | (XENTR)RTN4-B1           |          | BK004011 (AY164736) | 24     |
|                     |               | (XENTR)RTN4-B2           | BK004059 |                     | 24     |
|                     |               | (XENTR)RTN4-C            | BK004060 |                     | 24     |
|                     |               | (XENTR)RTN4-N            |          | BK004010 (AY164735) | 24     |
| Carassius auratus   | (CARAU)RTN3   |                          |          |                     |        |
|                     |               | (CARAU)RTN3w             |          | AY164748            | 24     |
|                     | (CARAU)RTN4   |                          |          |                     |        |
|                     |               | (CARAU)RTN4-M            |          | AY164754            | 22, 24 |
| Danio rerio         | (DANRE)rtn1   |                          |          |                     |        |
|                     |               | (DANRE)rtn1-a1           | AY555034 |                     |        |
|                     |               | (DANRE)rtn1-a2           | AY555035 |                     |        |
|                     |               | (DANRE)rtn1-c            | AY555036 | BC052753            | 25     |
|                     | (DANRE)rtn2   |                          |          |                     |        |
|                     |               | (DANRE)rtn2-c            | AY576807 |                     |        |
|                     | (DANRE)rtn3   |                          |          |                     |        |
|                     |               | (DANRE)rtn3-a1           | AY555037 | BC049315, BC062828  |        |
|                     |               | (DANRE)rtn3-a2           | AY555038 |                     |        |
|                     | (DANRE)rtn4   |                          |          |                     |        |
|                     |               | (DANRE)rtn4-j            | AY555039 |                     |        |
|                     |               | (DANRE)rtn4-l(-10/195)   | AY555040 |                     |        |
|                     |               | (DANRE)rtn4-l(-63/188)   | AY555041 |                     |        |
|                     |               | (DANRE)rtn4-m            | AY555042 |                     |        |
|                     |               | (DANRE)rtn4-n            | AY555043 |                     |        |
|                     | (DANRE)rtn5   |                          |          |                     |        |
|                     |               | (DANRE)rtn5-a1           | AY555044 |                     |        |
|                     |               | (DANRE)rtn5-a2           | AY555049 |                     |        |
|                     |               | (DANRE)rtn5-a1(265-1584) | AY555046 |                     |        |
|                     |               | (DANRE)rtn5-a1(297-2025) | AY555045 |                     |        |
|                     |               | (DANRE)rtn5-a1(309-2025) | AY555047 |                     |        |
|                     |               | (DANRE)rtn5-a1(558-1048) | AY555048 |                     |        |
|                     |               | (DANRE)rtn5-c            | AY555050 | BC059623            | 25     |
|                     | (DANRE)rtn6   |                          |          |                     |        |
|                     |               | (DANRE)rtn6-a1           | AY555051 |                     |        |
|                     |               | (DANRE)rtn6-a2           | AY555062 |                     |        |
|                     |               | (DANRE)rtn6-a3           | AY555063 |                     |        |

|                         |               |                           |          |                     |    |
|-------------------------|---------------|---------------------------|----------|---------------------|----|
|                         |               | (DANRE)rtm6-a1(337/555)   | AY555052 |                     |    |
|                         |               | (DANRE)rtm6-a1(1576/1860) | AY555053 |                     |    |
|                         |               | (DANRE)rtm6-a1(1761/2150) | AY555054 |                     |    |
|                         |               | (DANRE)rtm6-a1(1773/2152) | AY555055 |                     |    |
|                         |               | (DANRE)rtm6-a1(1774/2212) | AY555056 |                     |    |
|                         |               | (DANRE)rtm6-a1(1775/2140) | AY555057 |                     |    |
|                         |               | (DANRE)rtm6-a1(1775/2152) | AY555058 |                     |    |
|                         |               | (DANRE)rtm6-a1(1775/2344) | AY555059 |                     |    |
|                         |               | (DANRE)rtm6-a1(1777/1956) | AY555060 |                     |    |
|                         |               | (DANRE)rtm6-a1(2023/2173) | AY555061 |                     |    |
|                         | (DANRE)rtm8   |                           |          |                     |    |
|                         |               | (DANRE)rtm8-c             | AY555064 |                     |    |
|                         |               |                           |          |                     |    |
| Takifugu rubripes       | (FUGRU)RTN1   |                           |          | CAAB01001184        |    |
|                         |               | (FUGRU)rtm1-a1            | AY555026 |                     |    |
|                         | (FUGRU)RTN2   |                           |          |                     |    |
|                         |               | (FUGRU)rtm2c              | AY555027 |                     |    |
|                         | (FUGRU)RTN3   |                           |          | CAAB01002936        |    |
|                         |               | (FUGRU)rtm3-a1            | AY555028 | BK005087 (AY164745) | 24 |
|                         | (FUGRU)RTN4   |                           |          | CAAB01004137        |    |
|                         |               | (FUGRU)rtm4-i1            | AY555029 |                     |    |
|                         |               | (FUGRU)rtm4-i2            | AY555030 |                     |    |
|                         |               | (FUGRU)rtm4-i3            | AY555031 |                     |    |
|                         |               | (FUGRU)rtm4-n             | AY555032 | BK005090 (AY164753) | 24 |
|                         | (FUGRU)RTN7   |                           |          |                     |    |
|                         |               | (FUGRU)rtm7w              | BK005143 |                     |    |
|                         | (FUGRU)RTN8   |                           |          |                     |    |
|                         |               | (FUGRU)rtm8c              | AY555033 |                     |    |
|                         |               |                           |          |                     |    |
| Ictalurus punctatus     | (ICTPU)RTN1   |                           |          |                     |    |
|                         |               | (ICTPU)RTN1-C             |          | BK005086 (AY164720) | 24 |
|                         | (ICTPU)RTN2   |                           |          |                     |    |
|                         |               | (ICTPU)RTN2w              | BK004979 |                     | 24 |
|                         | (ICTPU)RTN5   |                           |          |                     |    |
|                         |               | (ICTPU)RTN5-Aw            |          | BK005089 (AY164752) | 24 |
|                         |               | (ICTPU)RTN5-Bw            |          | BK005102 (AY164751) | 24 |
|                         |               |                           |          |                     |    |
| Paralichthys olivaceus  | (PAROL)RTN3   |                           |          |                     |    |
|                         |               | (PAROL)RTN3               | BK005088 | (AY164746)          | 24 |
|                         |               |                           |          |                     |    |
| Oncorhynchus mykiss     | (ONCMY)RTN1   |                           |          |                     |    |
|                         |               | (ONCMY)RTN1-C             |          | BK005100 (AY262105) | 24 |
|                         | (ONCMY)RTN2*1 |                           |          |                     |    |
|                         |               | (ONCMY)RTN2*1             | BK004983 |                     | 24 |
|                         | (ONCMY)RTN2*2 |                           |          |                     |    |
|                         |               | (ONCMY)RTN2*2             | BK004982 |                     | 24 |
|                         | (ONCMY)RTN3   |                           |          |                     |    |
|                         |               | (ONCMY)RTN3-A1            |          | BK004987 (AY262104) | 24 |
|                         |               | (ONCMY)RTN3-A2            |          | BK005101 (AY262103) | 24 |
|                         | (ONCMY)RTN4   |                           |          |                     |    |
|                         |               | (ONCMY)RTN4-L             | BK004986 |                     | 24 |
|                         |               | (ONCMY)RTN4-Mw            |          | BK005093 AY262101   | 24 |
|                         |               | (ONCMY)RTN4-N             | BK004985 |                     | 24 |
|                         | (ONCMY)RTN7   |                           |          |                     |    |
|                         |               | (ONCMY)RTN7               |          | BK005092 (AY262100) | 24 |
|                         | (ONCMY)RTN8   |                           |          |                     |    |
|                         |               | (ONCMY)RTN8w              | BK004981 |                     | 24 |
|                         | (ONCMY)RTN9   |                           |          |                     |    |
|                         |               | (ONCMY)RTN9-A1            | BK005094 |                     | 24 |
|                         |               | (ONCMY)RTN9-A2            |          | BK005095 (AY262102) | 24 |
|                         | (ONCMY)RTN10  |                           |          |                     |    |
|                         |               | (ONCMY)RTN10-N            | BK004984 |                     | 24 |
|                         | (ONCMY)RTN11  |                           |          |                     |    |
|                         |               | (ONCMY)RTN11              | BK004980 |                     | 24 |
|                         |               |                           |          |                     |    |
| Oncorhynchus tshawytsch | (ONCTS)RTN1   |                           |          |                     |    |
|                         |               | (ONCTS)RTN1w              | BK004991 |                     | 24 |
|                         |               |                           |          |                     |    |
| Salmo salar             | (SALSA)RTN1   |                           |          |                     |    |
|                         |               | (SALSA)RTN1w (part1)      | BK004997 |                     | 24 |
|                         |               | (SALSA)RTN1w (part2)      | BK004996 |                     | 24 |
|                         | (SALSA)RTN3   |                           |          |                     |    |
|                         |               | (SALSA)RTN3w              | BK004995 |                     | 24 |
|                         | (SALSA)RTN4   |                           |          |                     |    |
|                         |               | (SALSA)RTN4-M             | BK004993 |                     | 24 |
|                         | (SALSA)RTN7   |                           |          |                     |    |
|                         |               | (SALSA)RTN7w              | BK004994 |                     | 24 |
|                         | (SALSA)RTN10  |                           |          |                     |    |
|                         |               | (SALSA)RTN10W             | BK004992 |                     | 24 |
|                         |               |                           |          |                     |    |
| Coregonus clupeaformis  | (CORCL)RTN1   |                           |          |                     |    |
|                         |               | (CORCL)RTN1w              | BK005001 |                     | 24 |
|                         |               |                           |          |                     |    |
| Cyprinus carpio         | (CYPCA)RTN1   |                           |          |                     |    |
|                         |               | (CYPCA)RTN1-C             |          | BK005091 (AY262099) | 24 |
|                         | (CYPCA)RTN3   |                           |          |                     |    |
|                         |               | (CYPCA)RTN3w              | BK004976 |                     | 24 |
|                         | (CYPCA)RTN4   |                           |          |                     |    |
|                         |               | (CYPCA)RTN4-N             |          | BK005098 (AY262098) | 24 |
|                         | (CYPCA)RTN5   |                           |          |                     |    |
|                         |               | (CYPCA)RTN5w              | BK004975 |                     | 24 |
|                         | (CYPCA)RTN6   |                           |          |                     |    |
|                         |               | (CYPCA)RTN6               |          | BK005097 (AY262097) | 24 |
|                         |               |                           |          |                     |    |
| Gasterosteus aculeatus  | (GASAC)RTN1   |                           |          |                     |    |
|                         |               | (GASAC)RTN1w              | BK004990 |                     | 24 |
|                         | (GASAC)RTN3   |                           |          |                     |    |
|                         |               | (GASAC)RTN3-A1            | BK004989 |                     | 24 |
|                         |               | (GASAC)RTN3-A2            | BK004988 |                     | 24 |
|                         |               |                           |          |                     |    |
| Oryzias latipes         | (ORYLA)RTN1   |                           |          |                     |    |
|                         |               | (ORYLA)RTN1-C             |          | BK005096 (AY262096) | 24 |
|                         | (ORYLA)RTN2   |                           |          |                     |    |
|                         |               | (ORYLA)RTN2               | BK005000 |                     | 24 |
|                         | (ORYLA)RTN3   |                           |          |                     |    |
|                         |               | (ORYLA)RTN3w              |          | BK005099 (AY164747) | 24 |
|                         | (ORYLA)RTN4   |                           |          |                     |    |
|                         |               | (ORYLA)RTN4w (part1)      | BK004999 |                     | 24 |
|                         |               | (ORYLA)RTN4w (part2)      | BK004998 |                     | 24 |

(1) Roebroek et al., 1996  
(2) Kools et al., 1994  
(3) Roebroek et al., 1993  
(4) Roebroek et al., 1998  
(5) Moreira et al., 1999  
(6) Oertle et al., 2003

(7) Yang et al., 2000  
(8) Nagase et al., 1998  
(9) GrandPré et al., 2000  
(10) Prinjha et al., 2000  
(11) Morris et al., 1999  
(12) Zhang et al., 2002

(13) Barske et al., unpublished  
(14) Geisler et al., 1992  
(15) Stubbs et al., 1996  
(16) Hamada et al., 2002  
(17) Baka et al., 1996  
(18) Ninkina et al., 1997

(19) Wiczorek and Hughes, 1992  
(20) Chen et al., 2000  
(21) Spillmann et al., 1998  
(22) Simonen, M.; Lecoq, E.; Leiteritz, D., unpublished  
(23) Klinger et al., 2004  
(24) Oertle et al., 2003  
(25) Strausberg et al., direct submission

<sup>a</sup> older accession numbers (in brackets) have been replaced by new third party annoation numbers (blue, bold)

**Supplementary Table 1E: Rates of nonsynonymous substitutions per nonsynonymous site ( $d_N$ ) and rates of synonymous substitutions per synonymous site ( $d_S$ ) calculated for the RHD**

|                   | (DANRE)rtn1 versus (DANRE)rtn5 | (DANRE)rtn1 versus (HUMAN)RTN1 | (DANRE)rtn5 versus (HUMAN)RTN1 |
|-------------------|--------------------------------|--------------------------------|--------------------------------|
| mean $d_N \pm SE$ | 13.39 $\pm$ 1.66               | 11.94 $\pm$ 1.58               | 14.14 $\pm$ 1.70               |
| mean $d_S \pm SE$ | 57.55 $\pm$ 4.18               | 68.48 $\pm$ 3.91               | 71.18 $\pm$ 3.81               |
| $d_N/d_S$         | 0.23                           | 0.17                           | 0.20                           |

|                   | (DANRE)rtn2 versus (DANRE)rtn8 | (DANRE)rtn2 versus (HUMAN)RTN2 | (DANRE)rtn8 versus (HUMAN)RTN2 |
|-------------------|--------------------------------|--------------------------------|--------------------------------|
| mean $d_N \pm SE$ | 39.10 $\pm$ 2.31               | 37.49 $\pm$ 2.31               | 45.17 $\pm$ 2.36               |
| mean $d_S \pm SE$ | 63.82 $\pm$ 3.90               | 69.23 $\pm$ 3.67               | 68.99 $\pm$ 3.68               |
| $d_N/d_S$         | 0.61                           | 0.54                           | 0.65                           |

|                   | (DANRE)rtn4 versus (DANRE)rtn6 | (DANRE)rtn4 versus (HUMAN)RTN4 | (DANRE)rtn6 versus (HUMAN)RTN4 |
|-------------------|--------------------------------|--------------------------------|--------------------------------|
| mean $d_N \pm SE$ | 27.81 $\pm$ 2.19               | 18.21 $\pm$ 1.87               | 32.79 $\pm$ 2.29               |
| mean $d_S \pm SE$ | 57.29 $\pm$ 4.09               | 70.66 $\pm$ 3.85               | 69.40 $\pm$ 3.83               |
| $d_N/d_S$         | 0.49                           | 0.26                           | 0.47                           |

|                   | (FUGRU)RTN2 versus (FUGRU)RTN8 | (FUGRU)RTN2 versus (HUMAN)RTN2 | (FUGRU)RTN8 versus (HUMAN)RTN2 |
|-------------------|--------------------------------|--------------------------------|--------------------------------|
| mean $d_N \pm SE$ | 39.45 $\pm$ 2.32               | 38.81 $\pm$ 2.35               | 41.76 $\pm$ 2.35               |
| mean $d_S \pm SE$ | 65.68 $\pm$ 3.82               | 62.25 $\pm$ 3.91               | 67.16 $\pm$ 3.69               |
| $d_N/d_S$         | 0.60                           | 0.62                           | 0.62                           |

|                   | (FUGRU)RTN3 versus (FUGRU)RTN7 | (FUGRU)RTN3 versus (HUMAN)RTN3 | (FUGRU)RTN7 versus (HUMAN)RTN3 |
|-------------------|--------------------------------|--------------------------------|--------------------------------|
| mean $d_N \pm SE$ | 29.80 $\pm$ 2.20               | 22.58 $\pm$ 2.02               | 32.75 $\pm$ 2.27               |
| mean $d_S \pm SE$ | 76.20 $\pm$ 3.59               | 71.31 $\pm$ 3.83               | 68.69 $\pm$ 3.92               |
| $d_N/d_S$         | 0.39                           | 0.31                           | 0.48                           |

**Supplementary Table 1F: Mapping data for the analysis of conserved syntenies between rtn1 in zebrafish and RTN1 in human**

| Accession 5'EST<br>Accession 3'EST <sup>1</sup> | Zebrafish LN54<br>LG | Zebrafish LN54<br>Marker Symbol | Human<br>Chromosome | Human<br>Position     | Human Accession      | Description                                                                                                                                |
|-------------------------------------------------|----------------------|---------------------------------|---------------------|-----------------------|----------------------|--------------------------------------------------------------------------------------------------------------------------------------------|
| AW127896                                        | 20                   | tf04e05                         | 6                   | 6q15 / ???            | BAA91551             | C6orf166 chromosome 6 open reading frame 166                                                                                               |
| AW115873                                        | 20                   |                                 |                     |                       | no significant resul |                                                                                                                                            |
| AI437041                                        | 20                   | fb37b08                         | 14                  | 14q24.3 / 78,190 K    | NP_036377            | SNW1 SKI-interacting protein                                                                                                               |
| AI415949                                        | 20                   |                                 | 14                  |                       | NP_036377            | SNW1 SKI-interacting protein                                                                                                               |
| NM_131081                                       | 20                   | cdh2                            | 18                  | 18q11.2 / 25,530 K    | AAB22854             | CDH2 cadherin 2, type 1, N-cadherin (neuronal)                                                                                             |
| AI626515                                        | 20                   | fc11b08                         | 8                   | 8p23.1 / ???          | NP_689779            | TDH L-threonine dehydrogenase                                                                                                              |
| AI601430                                        | 20                   |                                 |                     |                       | no significant resul |                                                                                                                                            |
| AW174194                                        | 20                   | tf40c10                         | 14                  | 14q / 103,700 K       | NP_001510            | BRF1 BRF1 homolog, subunit of RNA polymerase III transcription initiation factor IIIB (S. cerevisiae)                                      |
| AW171259                                        | 20                   |                                 |                     |                       | no significant resul |                                                                                                                                            |
| NM_180966                                       | 20                   | esr2a                           | 14                  | 14q / 62,740 K        | AAD32580             | ESR2 estrogen receptor 2 (ER beta)                                                                                                         |
|                                                 | 20                   | rtn1 <sup>2</sup>               | 14                  | 14q21-q22 / 58,180 K  |                      | RTN1 reticulon 1                                                                                                                           |
| AI584923                                        | 20                   | fb93a10                         | 15                  | 15q14 / 38,826 K      | NP_077016            | MGC4504 hypothetical protein MGC4504                                                                                                       |
| AI584393                                        | 20                   |                                 |                     |                       | no significant resul |                                                                                                                                            |
| AI584766                                        | 20                   | fb83b05*                        | 14                  | 14q23.3-31 / 75,920 K | NP_036243            | AHSA1 AHA1, activator of heat shock 90kDa protein ATPase homolog 1 (yeast)                                                                 |
| AI584258                                        | 20                   |                                 |                     |                       | no significant resul |                                                                                                                                            |
| BF718073                                        | 20                   | fd56a12                         | 15                  | 15q13 / 25,930 K      | NP_004658            | HERC2 hect domain and RLD 2                                                                                                                |
| AW019715                                        | 20                   |                                 |                     |                       | no significant resul |                                                                                                                                            |
| AI959375                                        | 20                   | fd08q07                         | 14                  | 14q32.13 / 91,760 K   | BAA96049             | FLJ10648 function unknown protein 1                                                                                                        |
| AI957952                                        | 20                   |                                 |                     |                       | no significant resul |                                                                                                                                            |
| AI830333                                        | 20                   | fd14e12                         | 14                  | 14q31-q32 / 92,410 K  | NP_057234            | ASB2 ankyrin repeat and SOCS box-containing 2                                                                                              |
| AI687222                                        | 20                   | fb08c11                         | 6                   | 6q24.1 / ???          | CAB66619             | C6orf55 chromosome 6 open reading frame 55                                                                                                 |
| AI397003                                        | 20                   |                                 |                     |                       | no significant resul |                                                                                                                                            |
| AI384710                                        | 20                   |                                 |                     |                       | no significant resul |                                                                                                                                            |
| AI626529                                        | 20                   | fc11c10                         | 1                   | 1q23.1 / 156,529 K    | NP_060293            | FLJ20442 hypothetical protein FLJ20442                                                                                                     |
| AI601442                                        | 20                   |                                 |                     |                       | no significant resul |                                                                                                                                            |
| AI437173                                        | 20                   | fb38e12                         | 15                  | 15q15.1 / 38,585 K    | NP_002866            | RAD51 RAD51 homolog (RecA homolog, E. coli) (S. cerevisiae)                                                                                |
| AI444341                                        | 20                   |                                 |                     |                       | no significant resul |                                                                                                                                            |
| AI584886                                        | 20                   | fb92f04                         | 6                   | 6q14.1 / ???          | XP_029179            | FILIP1 filamin A interacting protein 1                                                                                                     |
| AI584886                                        | 20                   |                                 |                     |                       | no significant resul |                                                                                                                                            |
| AI396883                                        | 20                   | fb14g10                         | 2                   | 2p23 / 26,450 K       | NP_000174            | HADHB hydroxyacyl-Coenzyme A dehydrogenase/3-ketoacyl-Coenzyme A thiolase/enoyl-Coenzyme A hydratase (trifunctional protein), beta subunit |
| AI384463                                        | 20                   |                                 |                     |                       | no significant resul |                                                                                                                                            |
| AF072456                                        | 20                   | bmp2b*                          | 20                  | 20p12 / 6,702 K       | NP_001191            | BMP2 bone morphogenetic protein 2                                                                                                          |
| AI588714                                        | 20                   | fb98e10                         | 14                  | 14q24.3 / 73,610 K    | NP_006818            | TMP21 transmembrane trafficking protein                                                                                                    |
| AI588267                                        | 20                   |                                 |                     |                       | no significant resul |                                                                                                                                            |
| BE201200                                        | 20                   | fk87c02                         | 14                  | 14q24.3 / 73,900 K    | NP_569736            | JDP2 jun dimerization protein 2                                                                                                            |
| BE200559                                        | 20                   |                                 | 14                  |                       | NP_569736            | JDP2 jun dimerization protein 2                                                                                                            |

| Accession 5'EST<br>Accession 3'EST <sup>1</sup> | Zebrafish T51<br>LG | Zebrafish T51<br>Marker Symbol | Human<br>Chromosome | Human<br>Position      | Human Accession      | Description                                                                       |
|-------------------------------------------------|---------------------|--------------------------------|---------------------|------------------------|----------------------|-----------------------------------------------------------------------------------|
| AW077677                                        | 20                  | tf36b10                        | 14                  | 14q31.1 / 79,650 K     | NP_056943            | GTF2A1 general transcription factor IIA, 1,19/37kDa                               |
| AW077677                                        | 20                  |                                | 14                  | 14q31.1 / 79,650 K     | NP_056943            | GTF2A1 general transcription factor IIA, 1,19/37kDa                               |
| NM_131459                                       | 20                  | pdgfra*                        | 4                   | 4q11-q13 / 54,980 K    | NP_006197            | PDGFRA platelet-derived growth factor receptor, alpha polypeptide                 |
| AI722747                                        | 20                  | fc31a09                        | 4                   | 4q12 / 56,127 K        | NP_060945            | TPARL TPA regulated locus                                                         |
| AI721687                                        | 20                  |                                |                     |                        | no significant resul |                                                                                   |
| AI964923                                        | 20                  | fc83b10                        | 14                  | 14q23.1 / 57,730 K     | NP_055807            | DAAM1 dishevelled associated activator of morphogenesis 1                         |
| AI943021                                        | 20                  |                                |                     |                        | no significant resul |                                                                                   |
| AI584766                                        | 20                  | fb83b05*                       | 14                  | 14q23.3-31 / 75,920 K  | NP_036243            | AHSA1 AHA1, activator of heat shock 90kDa protein ATPase homolog 1 (yeast)        |
| AI584258                                        | 20                  |                                |                     |                        | no significant resul |                                                                                   |
| AI58934                                         | 20                  | fb78b08                        | 14                  | 14q32.33 / 103,453 K   | NP_060425            | CDC4A cell division cycle associated 4                                            |
| AI58282                                         | 20                  |                                |                     |                        | no significant resul |                                                                                   |
| AW305563                                        | 20                  |                                |                     |                        | no significant resul |                                                                                   |
| AW281997                                        | 20                  | tf60e07                        | 14                  | 14q24.3-q31 / 79,960 K | NP_005056            | SEL1L sel-1 suppressor of lin-12-like (C. elegans)                                |
| AW184521                                        | 20                  | tf15d08                        | 14                  | 14q31 / 91,480 K       | AAH03622             | ITPK1 inositol 1,3,4-triphosphate 5/6 kinase                                      |
| AW232178                                        | 20                  |                                |                     |                        | no significant resul |                                                                                   |
| AI545336                                        | 20                  | fb74a06                        | 14                  | 14q32.13 / 91,675 K    | NP_786924            | C14orf130 chromosome 14 open reading frame 130                                    |
| AI545120                                        | 20                  |                                |                     |                        | no significant resul |                                                                                   |
| AW174563                                        | 20                  | tfj05f09                       | 14                  | 14q32 / 91,385 K       | P10645               | CHGA chromogranin A (parathyroid secretory protein 1)                             |
| AW203029                                        | 20                  |                                |                     |                        | no significant resul |                                                                                   |
| NM_131337                                       | 20                  | sox11b*                        | 2                   | 2p25 / 5,842 K         | NM_003108            | SOX11 SRY (sex determining region Y)-box 11                                       |
| NM_131370                                       | 20                  | acat2*                         | 6                   | 6q25.3-q26 / 160,025 K | AAH00408             | ACAT2 acetyl-Coenzyme A acetyltransferase 2 (acetoacetyl Coenzyme A thiolase)     |
| AI584923                                        | 20                  | fb93a10                        | 15                  | 15q14 / 38,826 K       | NP_077016            | MGC4504 hypothetical protein MGC4504                                              |
| AI584393                                        | 20                  |                                |                     |                        | no significant resul |                                                                                   |
| AI585238                                        | 20                  | fb95h11                        | 14                  | 14q23 / 63,540K        | AAH25685             | MAX MAX protein                                                                   |
| AI584586                                        | 20                  |                                |                     |                        | no significant resul |                                                                                   |
| AI722866                                        | 20                  | fc32f10                        | 2                   | 2p25.2 / 9,590K        | AAH11654             | CPSF3 cleavage and polyadenylation specific factor 3, 73kDa                       |
| AI722326                                        | 20                  |                                |                     |                        | no significant resul |                                                                                   |
| AI931020                                        | 20                  | fc76b10                        | 15                  | 15q13.2 / 32,050K      | NP_078989            | FLJ22557 hypothetical protein FLJ22557                                            |
| AI884253                                        | 20                  |                                |                     |                        | no significant resul |                                                                                   |
| AW077569                                        | 20                  | tfj35h03                       | 2                   | 2p24 / 8,920K          | T43458               | KIDINS220 likely homolog of rat kinase D-interacting substance of 220 kDa         |
| AW077331                                        | 20                  |                                |                     |                        | no significant resul |                                                                                   |
| NM_173245                                       | 20                  | vps18                          | 15                  | 15q14-q15 / 38,770K    | NP_536672            | VPS18 vacuolar protein sorting protein 18                                         |
| NM_131450                                       | 20                  | rm2                            | 2                   | 2p25-p24 / 10,283K     | NP_001025            | RRM2 ribonucleotide reductase M2 polypeptide                                      |
| NM_131228                                       | 20                  | elr                            | 14                  | 14q24.1 / 67,846K      | NP_004441            | ERH enhancer of rudimentary homolog (Drosophila)                                  |
| AI477869                                        | 20                  | fb57a02                        | 2                   | 2p24.1 / 16,089K       | CAA68678             | MYCN v-myc myelocytomatosis viral related oncogene, neuroblastoma derived (avian) |
| AI477486                                        | 20                  |                                |                     |                        | no significant resul |                                                                                   |
| BM736060                                        | 20                  | TSubC_2E1                      | 6                   | 6q24.3 / ???           | NP_056093            | SASH1 SAM and SH3 domain containing 1                                             |
| BM736061                                        | 20                  |                                | 6                   | 6q24.3 / ???           | NP_056093            | SASH1 SAM and SH3 domain containing 1                                             |
|                                                 | 20                  | wz11823                        | 2                   | 2p24-p23 / 21,200K     | CAA28420             | APOB apolipoprotein B (including Aq(x) antigen)                                   |
| AI497503                                        | 20                  | fb60h05                        | 4                   | 4q28 / 155,966K        | P02679               | FGG fibrinogen, gamma polypeptide                                                 |
| AI522694                                        | 20                  |                                |                     |                        | no significant resul |                                                                                   |
| AI877943                                        | 20                  | fc55e01                        | 8                   | 8q22-q23 / 108,910K    | NP_001559.1          | EIF3S6 eukaryotic translation initiation factor 3, subunit 6 48kDa                |
| AI793875                                        | 20                  |                                |                     |                        | no significant resul |                                                                                   |
| not available                                   |                     |                                |                     |                        |                      |                                                                                   |
| AW077587                                        | 20                  | tf65a12                        | 6                   | 6q21 / 108,840K        | NP_001446            | FOXO3A forkhead box O3A                                                           |
| AW077358                                        | 20                  | fb34b10                        | 2                   | 2p23.1 / 26,690K       | AAG12992             | OTOF otoferlin                                                                    |
| AW077137                                        | 20                  |                                |                     |                        | no significant resul |                                                                                   |
|                                                 | 20                  | wz12780                        | 1                   | 1q23.3 / 166,540K      | AAN23123             | PACE-1 ezrin-binding partner PACE-1                                               |
| AI794465                                        | 20                  | fc44g01                        | 1                   | 1q23.3 / 166,490K      | NP_060656            | FLJ10706 hypothetical protein FLJ10706                                            |
| AI883270                                        | 20                  |                                |                     |                        | no significant resul |                                                                                   |
| AF506208                                        | 20                  | mcm3                           | 6                   | 6p12 / 52,140K         | NP_002379            | MCM3 MCM3 minichromosome maintenance deficient 3 (S. cerevisiae)                  |

<sup>1</sup> only one accession number for cloned gene

<sup>2</sup> RTN1 radiation hybrid PCR result: 000000100000000001010001000010100000210000000100100000000000100000020000100012000001001 LOD score = 13.4

\* Woods et. al., 2000



**Supplementary Table 1G: Mapping data for the analysis of conserved syntenies between *rtn2* in zebrafish and RTN2 in human**

| Accession 5'EST<br>Accession 3'EST <sup>1</sup> | Zebrafish LN54<br>LG | Zebrafish LN54<br>Marker Symbol | Human<br>Chromosome | Human<br>Position          | Human Accession       | Description                                                                           |
|-------------------------------------------------|----------------------|---------------------------------|---------------------|----------------------------|-----------------------|---------------------------------------------------------------------------------------|
| BE016623                                        | 15                   | fb66c02                         | 3                   | 3q25.32 / 159,708K         | AAF82807              | LXN latexin protein                                                                   |
| BE016156                                        | 15                   |                                 | 3                   | 3q25.32 / 159,708K         | AAF82807              | LXN latexin protein                                                                   |
| AW827061                                        | 15                   | fb57h10                         | 3                   | 3q22.1 / 134,853 K         | AAH63001              | SRPRB signal recognition particle receptor, B subunit                                 |
| AW826781                                        | 15                   |                                 | 3                   |                            | AAH63001              | SRPRB signal recognition particle receptor, B subunit                                 |
| NM_131670                                       | 15                   | atp1b3b (fb13c07)               | 3                   | 3q22-q23 / 142,940 K       | NP_001670             | ATP1B3 ATPase, Na <sup>+</sup> /K <sup>+</sup> transporting, beta 3 polypeptide       |
| AI496976                                        | 15                   | fb53f10                         | 19                  | 19q13.2 / 44,025K          | BAB18649              | HNRPL heterogeneous nuclear ribonucleoprotein L                                       |
| AI497448                                        | 15                   |                                 | 19                  |                            | no significant result |                                                                                       |
| AI477906                                        | 15                   | fb57d05                         | 19                  | 19q13 / 44,072 K           | NP_036369             | SIRT2 sirtuin (silent mating type information regulation 2 homolog) 2 (S. cerevisiae) |
| AI477520                                        | 15                   |                                 | 19                  |                            | no significant result |                                                                                       |
| AI522601                                        | 15                   | fb60b03                         | 19                  | 19q13.3 / 52,943 K         | AAH07248              | GLTSCR2 glioma tumor suppressor candidate region gene 2                               |
| AI497098                                        | 15                   |                                 | 19                  | 19q13.3 / 52,943 K         | AAH07248              | GLTSCR2 glioma tumor suppressor candidate region gene 2                               |
|                                                 |                      | <b>rtn 2 <sup>2</sup></b>       | <b>19</b>           | <b>19q13.32 / 50,686 K</b> |                       | <b>RTN2 reticulin 2</b>                                                               |
| AI331148                                        | 15                   | fb05d08                         | 17                  | 17q23.2 / 60,300K          | CAB66646              | VMP1 likely ortholog of rat vacuole membrane protein 1                                |
| AI330892                                        | 15                   |                                 |                     |                            | no significant result |                                                                                       |

| Accession 5'EST<br>Accession 3'EST <sup>1</sup> | Zebrafish T51<br>LG | Zebrafish T51<br>Marker Symbol | Human<br>Chromosome | Human<br>Position      | Human Accession       | Description                                                                              |
|-------------------------------------------------|---------------------|--------------------------------|---------------------|------------------------|-----------------------|------------------------------------------------------------------------------------------|
| AI585206                                        | 15                  | fb95e09                        | 17                  | 17q23.2 / 57,800 K     | NP_872375             | FLJ37451 hypothetical protein FLJ37451                                                   |
| AI584556                                        | 15                  |                                |                     |                        | no significant result |                                                                                          |
| AI545363                                        | 15                  | fb74d01                        | 7                   | 7q11.22 / 65,990 K     | AAH15591              | FLJ10900 hypothetical protein FLJ10900                                                   |
| AI545141                                        | 15                  |                                |                     |                        | no significant result |                                                                                          |
| AW280776                                        | 15                  | fj45g03                        | 17                  | 17p13.3 / 659 K        | NP_057164             | CGI-150 CGI-150 protein                                                                  |
| AW279847                                        | 15                  |                                | 17                  | 17p13.3 / 659 K        | NP_057164             | CGI-150 CGI-150 protein                                                                  |
|                                                 | 15                  | tcf2                           | 17                  | 17cen-q21.3 / 36,270 K | NP_000449             | TCF2 transcription factor 2, hepatic; LF-B3; variant hepatic nuclear factor              |
| AW281708                                        | 15                  | fj53g11                        | 17                  | 17q11.2 / 27,103 K     | XP_371036             | KIAA0100 KIAA0100 gene product                                                           |
| AW281348                                        | 15                  |                                |                     |                        | no significant result |                                                                                          |
| AI522601                                        | 15                  | fb60b03                        | 19                  | 19q13.3 / 52,943 K     | AAH07248              | GLTSCR2 glioma tumor suppressor candidate region gene 2                                  |
| AI497098                                        | 15                  |                                | 19                  | 19q13.3 / 52,943 K     | AAH07248              | GLTSCR2 glioma tumor suppressor candidate region gene 2                                  |
| AI477906                                        | 15                  | fb57d05                        | 19                  | 19q13 / 44,072 K       | NP_036369             | SIRT2 sirtuin (silent mating type information regulation 2 homolog) 2 (S. cerevisiae)    |
| AI477520                                        | 15                  |                                |                     |                        | no significant result |                                                                                          |
| AI331661                                        | 15                  | fa99f01                        | 19                  | 19q13.3-q13.4 / 55,090 | AAH64378              | IL4I1 interleukin 4 induced 1                                                            |
| AI331619                                        | 15                  |                                |                     |                        | no significant result |                                                                                          |
| AI444403                                        | 15                  | fb38a08                        | 19                  | 19q13.41 / 57,403 K    | NP_055040             | PPP2R1A protein phosphatase 2 (formerly 2A), regulatory subunit A (PR 65), alpha isoform |
| AI437123                                        | 15                  |                                |                     |                        | no significant result |                                                                                          |
| AI546048                                        | 15                  | fb77e08                        | 17                  | 17p13.3 / 2,810 K      | AAH63786              | KIAA0664 KIAA0664 protein                                                                |
| AI544670                                        | 15                  |                                |                     |                        | no significant result |                                                                                          |
| AW133613                                        | 15                  | fi09d09                        | 17                  | 17p13.3 / 2,570 K      | AAH50603              | MGC3329 hypothetical protein MGC3329                                                     |
| AW116121                                        | 15                  |                                | 17                  | 17p13.3 / 2,570 K      | AAH50603              | MGC3329 hypothetical protein MGC3329                                                     |
| AI546041                                        | 15                  | fb77d11                        | 17                  | 17p13.3 / 500 K        | AAK27973              | FLJ10979 hypothetical protein FLJ10979                                                   |
| AI544668                                        | 15                  |                                |                     |                        | no significant result |                                                                                          |

<sup>1</sup> only one accession number for cloned genes

<sup>2</sup> RTN2 radiation hybrid PCR result: 1010010000000000000000212020001000000000100000011000000000000101100001020010001010010021011

LOD score = 13.4

**Supplementary Table 1H: Mapping data for the analysis of conserved syntenies between rtn3 in zebrafish and RTN3 human**

| Accession 5'EST<br>Accession 3'EST <sup>1</sup> | Zebrafish LN54<br>LG | Zebrafish LN54<br>Marker Symbol | Human<br>Chromosome | Human<br>Position         | Human Accession       | Description                                                         |
|-------------------------------------------------|----------------------|---------------------------------|---------------------|---------------------------|-----------------------|---------------------------------------------------------------------|
| AI496942                                        | 7                    | fb53c07                         | 11                  | 11q13.1 / 66,078 K        | AAH00401              | SF3B2 splicing factor 3b, subunit 2, 145kDa                         |
| AI497263                                        | 7                    |                                 | 11                  | 11q13.1 / 66,078 K        | AAH00401              | SF3B2 splicing factor 3b, subunit 2, 145kDa                         |
| AI558347                                        | 7                    | fb72a06                         | 2                   | 2p13.2-p13.3 / ???        | NP_653183             | TEX261 testis expressed gene 261                                    |
| AI544537                                        | 7                    |                                 |                     |                           | no significant result |                                                                     |
| AI722947                                        | 7                    | fc27g06                         | 5                   | 5q35.3 / ???              | AAF67007              | RNF130 ring finger protein 130                                      |
| AI722468                                        | 7                    |                                 |                     |                           | no significant result |                                                                     |
| AI657668                                        | 7                    | fc16a03                         | 15                  | 15q26.3 / 99,407 K        | AAK15708              | LOC55829 AD-015 protein                                             |
| AI641466                                        | 7                    |                                 |                     |                           | no significant result |                                                                     |
| AA497354                                        | 7                    | fa04g07                         | 16                  | 16p11.2 / 31,113 K        | NP_005872             | BCKDK branched chain alpha-ketoacid dehydrogenase kinase            |
| AA497274                                        | 7                    |                                 |                     |                           | no significant result |                                                                     |
| AI959182                                        | 7                    | fd07h02                         | 15                  | 15q21-q22 / 62,848 K      | NP_057714             | ACP33 acid cluster protein 33                                       |
| AI957903                                        | 7                    |                                 |                     |                           | no significant result |                                                                     |
| AI397205                                        | 7                    | fb06g09 <sup>2</sup>            | 11                  | 11q13 / 61,964 K          | NP_002023             | FTH1 ferritin, heavy polypeptide 1                                  |
| AI385072                                        | 7                    |                                 |                     |                           | NP_002023             | FTH1 ferritin, heavy polypeptide 1                                  |
| AF212919                                        | 7                    | men1**                          | 11                  | 11q13 / 64,825 K          | NP_570711             | MEN1 multiple endocrine neoplasia I                                 |
| AW174010                                        | 7                    | fl38c09                         | 11                  | 11p13 / 31,700 K          | NP_061913             | ELP4 elongation protein 4 homolog (S. cerevisiae)                   |
| AW171173                                        | 7                    |                                 |                     |                           | no significant result |                                                                     |
| AI882683                                        | 7                    | fb15b04                         | 11                  | 11p15.1 / 20,434 K        | NP_006401             | HTATIP2 HIV-1 Tat interactive protein 2, 30kDa                      |
| AI396618                                        | 7                    |                                 | 11                  | 11p15.1 / 20,434 K        | NP_006401             | HTATIP2 HIV-1 Tat interactive protein 2, 30kDa                      |
|                                                 | 7                    | rtm3 <sup>3</sup>               | 11                  | 11q13 / 63,740 K          |                       | RTN3 reticulin 3                                                    |
| AI657572                                        | 7                    | fc15c04                         | 11                  | 11p15.1 / 20,219 K        | XP_061930             | similar to Homeobox protein DBX1                                    |
| AI641452                                        | 7                    |                                 | 11                  | 11p15.1 / 20,219 K        | XP_061930             | similar to Homeobox protein DBX1                                    |
| AI722072                                        | 7                    | fd19a03                         | 4                   | 4p16.3 / 2,200 K          | NP_078787             | MGC4701 hypothetical protein MGC4701                                |
| AI722486                                        | 7                    |                                 | 4                   | 4p16.3 / 2,200 K          | NP_078787             | MGC4701 hypothetical protein MGC4701                                |
| AI332008                                        | 7                    | fa96d04                         | 11                  | 11q13.1 / 64,295 K        | NP_004313             | BAD BCL2-antagonist of cell death                                   |
| AI330583                                        | 7                    |                                 |                     |                           | no significant result |                                                                     |
| AI584984                                        | 7                    | fb93g04                         | X                   | Xq28 / 147,770 K          | AAL86617              | CD99L2 CD99 antigen-like 2                                          |
| AI584442                                        | 7                    |                                 |                     |                           | no significant result |                                                                     |
| AI657704                                        | 7                    | fc16d12                         | 17                  | 17p13.2 / ???             | AAH32510              | MGC49942 hypothetical protein MGC49942                              |
| AI641499                                        | 7                    |                                 | 17                  | 17p13.2 / ???             | AAH32510              | MGC49942 hypothetical protein MGC49942                              |
| AI721901                                        | 7                    | fc26h10                         | 2                   | 2p13.2 / 72,234 K         | NP_063938             | P450RAI-2 cytochrome P450 retinoid metabolizing protein             |
| AI722415                                        | 7                    |                                 |                     |                           | no significant result |                                                                     |
| AI657750                                        | 7                    | fc17a06 <sup>4</sup>            | 13                  | 13q32 / 95,225 K          | AAH33823              | DNAJC3 DnaJ (Hsp40) homolog, subfamily C, member                    |
| AI641576                                        | 7                    |                                 |                     |                           | no significant result |                                                                     |
| AW165381                                        | 7                    | fe01c06                         | 11                  | 11q12.3 / 62,637 K        | NP_036332             | B3GAT3 beta-1,3-glucuronyltransferase 3 (glucuronosyltransferase I) |
| AW165387                                        | 7                    |                                 |                     |                           | no significant result |                                                                     |
| AW174821                                        | 7                    | fe06a10                         | 14                  | 14q11.2 / 21,536 K        | AAD56725              | ACINUS apoptotic chromatin condensation inducer in the nucleus      |
| AW165225                                        | 7                    |                                 |                     |                           | no significant result |                                                                     |
| AI626294                                        | 7                    | fc12g04                         | 1                   | 1p36.13-q31.3 / 147,014 K | AAH08732              | APH-1A likely ortholog of C. elegans anterior pharynx defective 1A  |
| AI601857                                        | 7                    |                                 |                     |                           | no significant result |                                                                     |
| AW128556                                        | 7                    | fe17d05                         | 16                  | 16q22.1 / 70,020 K        | NP_478126             | MTR3 homolog of yeast mRNA transport regulator 3                    |
| AW117040                                        | 7                    |                                 | 16                  | 16q22.1 / 70,020 K        | NP_478126             | MTR3 homolog of yeast mRNA transport regulator 3                    |
| BF717593                                        | 7                    | fd47d02                         | 11                  | 11p15.3 / 9,016 K         | NP_065695             | C11orf15 chromosome 11 open reading frame 15                        |
| AW018955                                        | 7                    |                                 |                     |                           | no significant result |                                                                     |
| no sequence available                           |                      |                                 |                     |                           |                       |                                                                     |
| AI878766                                        | 7                    | fc66c05                         | 11                  | 11p15.2 / 14,530 K        | AI878766              | COPB coatomer protein complex, subunit beta                         |
| AI626516                                        | 7                    | fc11b09                         | 11                  | 11p15 / 8,860 K           | CAC35387              | ST5 suppression of tumorigenicity 5                                 |
| AI601431                                        | 7                    |                                 | 11                  | 11p15 / 8,860 K           | CAC35387              | ST5 suppression of tumorigenicity 5                                 |

| Accession 5'EST<br>Accession 3'EST <sup>1</sup> | Zebrafish T51<br>LG | Zebrafish T51 Marker<br>Symbol | Human<br>Chromosome | Human<br>Position      | Human Accession       | Description                                                             |
|-------------------------------------------------|---------------------|--------------------------------|---------------------|------------------------|-----------------------|-------------------------------------------------------------------------|
| AW175082                                        | 7                   | fb32a10                        | 1                   | 1q42.13 / ???          | NP_775106             | TGS TUDOR gene similar                                                  |
| AW154742                                        | 7                   |                                | 1                   | 1q42.13 / ???          | NP_775106             | TGS TUDOR gene similar                                                  |
|                                                 | 7                   | wz12563                        | 4                   | 4q32.3 / 171,510 K     | BAA31601              | KIAA0626 KIAA0626 gene product                                          |
| AI558347                                        | 7                   | fb72a06                        | 2                   | 2p13.2-p13.3 / ???     | NP_653183             | TEX261 testis expressed gene 261                                        |
| AI544537                                        | 7                   |                                |                     |                        | no significant result |                                                                         |
| NM_131585                                       | 7                   | fth1 <sup>+-2</sup>            | 11                  | 11q13 / 61,984 K       | NM_002032             | FTH1 ferritin, heavy polypeptide 1                                      |
| AW233285                                        | 7                   | fj30e04                        | 11                  | 11q12.3 / 61,456 K     | NP_060311             | FLJ20487 hypothetical protein FLJ20487                                  |
| AW232790                                        |                     |                                |                     |                        | no significant result |                                                                         |
| AI584932                                        | 7                   | fb93b07                        | 15                  | 15q22.2-q22.3 / 63,038 | NP_006651             | CLPX ClpX caseinolytic protease X homolog (E. coli)                     |
| AI584400                                        | 7                   |                                |                     |                        | no significant result |                                                                         |
| AI882683                                        | 7                   | fb15b04                        | 11                  | 11p15.1 / 20,434 K     | NP_006401             | HTATIP2 HIV-1 Tat interactive protein 2, 30kDa                          |
| AI396618                                        | 7                   |                                | 11                  | 11p15.1 / 20,434 K     | NP_006401             | HTATIP2 HIV-1 Tat interactive protein 2, 30kDa                          |
| AF212919                                        | 7                   | men1 <sup>**</sup>             | 11                  | 11q13 / 64,825 K       | NP_570711             | MEN1 multiple endocrine neoplasia I                                     |
| AI722815                                        | 7                   | fc32a02                        | 17                  | 17p11.2 / 17,110 K     | NP_003644             | COP3 COP9 constitutive photomorphogenic homolog subunit 3 (Arabidopsis) |
| AI722283                                        | 7                   |                                |                     |                        | no significant result |                                                                         |
| AW154045                                        | 7                   | fi29g02                        | 11                  | 11q12-q13.1 / 62,612 K | NP_004730             | MTA1L1 metastasis-associated 1-like 1                                   |
| AW154581                                        | 7                   |                                |                     |                        | no significant result |                                                                         |
| AI942769                                        | 7                   | fc75e01                        | 17                  | 17p11-p13 / 7,068 K    | NP_000009             | ACADVL acyl-Coenzyme A dehydrogenase, very long chain                   |
| AI884210                                        | 7                   |                                |                     |                        | no significant result |                                                                         |
| NM_131630                                       | 7                   | prkri <sup>-4</sup>            | 13                  | 13q32 / 95,220 K       | NP_006251             | DNAJC3 DnaJ (Hsp40) homolog, subfamily C, member                        |
| AI878151                                        | 7                   | fc58a11                        | 12                  | 12q14.3 / 69,704 K     | NP_006422             | CCT2 chaperonin containing TCP1, subunit 2 (beta)                       |
| AI878428                                        | 7                   |                                | 12                  | 12q14.3 / 69,704 K     | NP_006422             | CCT2 chaperonin containing TCP1, subunit 2 (beta)                       |
| AW305645                                        | 7                   | fj61g07                        | 7                   | 7q22 / 99,902 K        | NP_005828             | RPP20 POP7 (processing of precursor, S. cerevisiae) homolog             |
| AW282070                                        | 7                   |                                | 7                   | 7q22 / 99,902 K        | NP_005828             | RPP20 POP7 (processing of precursor, S. cerevisiae) homolog             |
| AW419738                                        |                     | fj82g07                        | 14                  | 14q11.1 / 19,963 K     | AAB71850              | METTL3 methyltransferase like 3                                         |
| AW420537                                        |                     |                                | 14                  | 14q11.1 / 19,963 K     | AAB71850              | METTL3 methyltransferase like 3                                         |
| AI626516                                        | 7                   | fc11b09                        | 11                  | 11p15 / 8,860 K        | CAC35387              | ST5 suppression of tumorigenicity 5                                     |
| AI601431                                        | 7                   |                                | 11                  | 11p15 / 8,860 K        | CAC35387              | ST5 suppression of tumorigenicity 5                                     |

<sup>1</sup> only one accession number for cloned genes      <sup>2</sup> fb06g09 (LN54) and fth1 (T51) represent the same gene

[illegible]

<sup>4</sup>fc17a06 (LN54) and prkri (T51) represent the same gene.

\*\* Yoder et. Litman, 2000

**Supplementary Table 1I: Mapping data for the analysis of conserved syntenies between rtn4 in zebrafish and RTN4 human**

| Accession 5'EST<br>Accession 3'EST <sup>1</sup> | Zebrafish LN54<br>LG | Zebrafish LN54<br>Marker Symbol | Human<br>Chromosome | Human<br>Position       | Human Accession       | Description                                                                              |
|-------------------------------------------------|----------------------|---------------------------------|---------------------|-------------------------|-----------------------|------------------------------------------------------------------------------------------|
| not available                                   |                      |                                 |                     |                         |                       |                                                                                          |
| BE017380                                        | 6                    | fk75d08                         | 22                  | 22q13.1 / 33,990 K      | Q9UGU5                | HMG2L1 high-mobility group protein 2-like 1                                              |
| AW174737                                        | 6                    | fe02h09                         | 20                  | 20q11.21 / 32,969 K     | NP_009169             | PXMP4 peroxisomal membrane protein 4, 24kDa                                              |
| AW165160                                        | 6                    |                                 | 20                  | 20q11.21 / 32,969 K     | NP_009169             | PXMP4 peroxisomal membrane protein 4, 24kDa                                              |
| AI384762                                        | 6                    | fb17a02*                        | 2                   | 2p13-p14 / 55,190 K     | NP_008939             | RTN4 reticulon 4                                                                         |
| AI397219                                        | 6                    |                                 |                     |                         | no significant result |                                                                                          |
| AI588654                                        | 6                    | fb97g10                         | 14                  | 14q11.1 / 19,540 K      | BAB84883              | FLJ10357 hypothetical protein FLJ10357                                                   |
| AI588215                                        | 6                    |                                 |                     |                         | no significant result |                                                                                          |
| AW019441                                        | 6                    | fe11e12                         | 2                   | 2q31.1 / 172,890 K      | BAA09486              | TLK1 tousled-like kinase 1                                                               |
| AW059314                                        | 6                    |                                 |                     |                         | no significant result |                                                                                          |
| AI883574                                        | 6                    | fc66d05                         | 13                  | 13q22.1 / 78,860 K      | BAB55125              | C13orf10 chromosome 13 open reading frame 10                                             |
| AI878772                                        | 6                    |                                 |                     |                         | no significant result |                                                                                          |
|                                                 | 6                    | rtn4 <sup>2</sup>               | 2                   | 2p13-p14 / 55,190 K     |                       | RTN4 reticulon 4                                                                         |
| AI416175                                        | 6                    | fb19b11                         | 12                  | 12q13 / 56,220 K        | NP_006182             | PA2G4 proliferation-associated 2G4, 38kDa                                                |
| AI522470                                        | 6                    |                                 |                     |                         | no significant result |                                                                                          |
| BF717955                                        | 6                    | fd54d02                         | 12                  | 12q13.11 / 49,034 K     | NP_057678             | FKBP11 FK506 binding protein 11, 19 kDa                                                  |
| AW019545                                        | 6                    |                                 |                     |                         | no significant result |                                                                                          |
| NM_131286                                       | 6                    | sox21*                          | 13                  | 13q31-q32 / 94,210 K    | NP_009015             | SOX21 SRY (sex determining region Y)-box 21                                              |
| AI416205                                        | 6                    | fb19f01                         | 19                  | 19p13.2-p13.3 / 11,533K | P13686                | ACP5 acid phosphatase 5, tartrate resistant                                              |
| AI522481                                        | 6                    |                                 | 19                  | 19p13.2-p13.3 / 11,533K | P13686                | ACP5 acid phosphatase 5, tartrate resistant                                              |
| AW133793                                        | 6                    | fi11h08                         | 19                  | 19p13.1 / 15,385 K      | BAB55234              | WIZ widely-interspaced zinc finger motifs                                                |
| AW128209                                        | 6                    |                                 |                     |                         | no significant result |                                                                                          |
| AI437237                                        | 6                    | fb39c08                         | 2                   | 2q32-q33 / 192,668 K    | NP_004648             | SDPR serum deprivation response (phosphatidylserine binding protein)                     |
| AI444529                                        | 6                    |                                 |                     |                         | no significant result |                                                                                          |
| AA494577                                        | 6                    |                                 |                     |                         | no significant result |                                                                                          |
| AA494670                                        | 6                    | fa10c06                         | 2                   | 2q33.3 / 204,100 K      | AAG09681              | CYP20A1 cytochrome P450, family 20, subfamily A, polypeptide 1                           |
| AI883564                                        | 6                    | fc66b09                         | 2                   | 2q31.1 / 174,990 K      | NP_037473             | PTD004 hypothetical protein PTD004                                                       |
| AI878763                                        | 6                    |                                 |                     |                         | NP_037473             |                                                                                          |
| AW174122                                        | 6                    | fi39e04                         | 2                   | 2q33.2 / 203,650 K      | NP_612477             | LOC130026 hypothetical protein BC000993                                                  |
| AW171348                                        | 6                    |                                 |                     |                         | no significant result |                                                                                          |
| BF717616                                        | 6                    | fd47f07                         | 13                  | 13q33-q34 / 98,210 K    | NP_005064             | SLC15A1 solute carrier family 15 (oligopeptide transporter), member 1                    |
| AW018970                                        | 6                    |                                 |                     |                         | no significant result |                                                                                          |
| AI416096                                        | 6                    | fb33h05                         | 2                   | 2q33-q34 / 206,970 K    | AAH22368              | NDUFS1 NADH dehydrogenase (ubiquinone) Fe-S protein 1, 75kDa (NADH-coenzyme Q reductase) |
| AI437455                                        | 6                    |                                 | 2                   |                         | AAH22368              | NDUFS1 NADH dehydrogenase (ubiquinone) Fe-S protein 1, 75kDa (NADH-coenzyme Q reductase) |
| AI722248                                        | 6                    | fd20h08                         | 2                   | 2q12 / 106,070 K        | O43639                | NCK2 NCK adaptor protein 2                                                               |
| AI721455                                        | 6                    |                                 |                     |                         | no significant result |                                                                                          |

| Accession 5'EST<br>Accession 3'EST <sup>1</sup> | Zebrafish T 51<br>LG | Zebrafish T 51 Marker<br>Symbol | Human<br>Chromosome | Human<br>Position        | Human Accession       | Description                                                                       |
|-------------------------------------------------|----------------------|---------------------------------|---------------------|--------------------------|-----------------------|-----------------------------------------------------------------------------------|
| AW595289                                        | 6                    | fk30b04                         | 22                  | 22q13.1 / 38,160 K       | AAH16855              | ATF4 activating transcription factor 4 (tax-responsive enhancer element B67)      |
| AW566985                                        | 6                    |                                 | 22                  | 22q13.1 / 38,160 K       | AAH16855              | ATF4 activating transcription factor 4 (tax-responsive enhancer element B67)      |
| AI558981                                        | 6                    | fb78g05                         | 4                   | 4q35.1 / 185,190 K       | AAH22185              | FLJ12716 hypothetical protein FLJ12716                                            |
| AI558325                                        | 6                    |                                 | 4                   | 4q35.1 / 185,190 K       | AAH22185              | FLJ12716 hypothetical protein FLJ12716                                            |
| AW174737                                        | 6                    | fe02h09                         | 20                  | 20q11.21 / 32,969 K      | NP_009169             | PXMP4 peroxisomal membrane protein 4, 24kDa                                       |
| AW165160                                        | 6                    |                                 | 20                  | 20q11.21 / 32,969 K      | NP_009169             | PXMP4 peroxisomal membrane protein 4, 24kDa                                       |
| AI384191                                        | 6                    | fb17f11*                        | 2                   | 2q31.1 / 170,626 K       | I37989                | SSB Sjogren syndrome antigen B (autoantigen La)                                   |
| AI397239                                        | 6                    |                                 |                     |                          | no significant result |                                                                                   |
| AW171070                                        | 6                    | fi37a09                         | 2                   | 2q31.1 / 170,430 K       | NP_004783             | PPIG peptidyl-prolyl isomerase G (cyclophilin G)                                  |
| AW173843                                        | 6                    |                                 |                     |                          | no significant result |                                                                                   |
| AW019441                                        | 6                    | fe11e12                         | 2                   | 2q31.1 / 172,890 K       | BAA09486              | TLK1 tousled-like kinase 1                                                        |
| AW059314                                        | 6                    |                                 |                     |                          | no significant result |                                                                                   |
| AW202751                                        | 6                    | fi21g01                         | 2                   | 2q33 / 202,240 K         | NP_055864             | ALS2CR3 amyotrophic lateral sclerosis 2 (juvenile) chromosome region, candidate 3 |
| AW232545                                        | 6                    |                                 | 2                   | 2q33 / 202,240 K         | NP_055864             | ALS2CR3 amyotrophic lateral sclerosis 2 (juvenile) chromosome region, candidate 3 |
| AW567512                                        | 6                    | fk28d02                         | 2                   | 2q31.1 / 172,540 K       | NP_001369             | DNCI2 dynein, cytoplasmic, intermediate polypeptide 2                             |
| AW595038                                        | 6                    |                                 |                     |                          | no significant result |                                                                                   |
| AW153485                                        | 6                    | fi22c04                         | 22                  | 22q13.1 / 35,000 K       | NP_002464             | MYH9 myosin, heavy polypeptide 9, non-muscle                                      |
| AW154082                                        | 6                    |                                 | 22                  | 22q13.1 / 35,000 K       | NP_002464             | MYH9 myosin, heavy polypeptide 9, non-muscle                                      |
| NM_131286                                       | 6                    | sox21*                          | 13                  | 13q31-q32 / 94,210 K     | NP_009015             | SOX21 SRY (sex determining region Y)-box 21                                       |
| AI497023                                        | 6                    | fb59c03                         | 2                   | 2p14-p16 / 55,438 K      | NP_002444             | MTIF2 mitochondrial translational initiation factor 2                             |
| AI522554                                        | 6                    |                                 | 2                   | 2p14-p16 / 55,438 K      | NP_002444             | MTIF2 mitochondrial translational initiation factor 2                             |
| AI384762                                        | 6                    | fb17a02*                        | 2                   | 2p13-p14 / 55,190 K      | NP_008939             | RTN4 reticulon 4                                                                  |
| AI397219                                        | 6                    |                                 |                     |                          | no significant result |                                                                                   |
| BM735955                                        | 6                    | tdsubc 1f2                      | 2                   | 2p16 / 55,419 K          | AAA36788              | RPS27A ribosomal protein S27a                                                     |
| AA494577                                        | 6                    |                                 |                     |                          | no significant result |                                                                                   |
| AA494670                                        | 6                    | fa10c06                         | 2                   | 2q33.3 / 204,100 K       | AAG09681              | CYP20A1 cytochrome P450, family 20, subfamily A, polypeptide 1                    |
| AI416129                                        | 6                    | fb18c11                         | 13                  | 13q12.2-q13.3 / 47,360 K | NP_003841             | SUCLA2 succinate-CoA ligase, ADP-forming, beta subunit                            |
| AI397474                                        | 6                    |                                 |                     |                          | no significant result |                                                                                   |
| NM_131445                                       | 6                    | chma1                           | 2                   | 2q24-q32 / 175,585 K     | NP_000070             | CHRNA1 cholinergic receptor, nicotinic, alpha polypeptide 1 (muscle)              |
| AW342883                                        | 6                    | fi80c12                         | 2                   | 2q31 / 176,790 K         | BAB21806              | KIAA1715 KIAA1715 protein                                                         |
| AW420343                                        | 6                    |                                 |                     |                          | no significant result |                                                                                   |

<sup>1</sup> only one accession number for cloned genes

<sup>2</sup> RTN4 radiation hybrid PCR result: 000011000000000000000000110000111000011111011100100000010020000000000010022100000011100\*LOD score = 11.6

\* Woods et. al., 2000

**Supplementary Table 1J: Mapping data for the analysis of conserved syntenies between rtn6 and rtn5 in zebrafish and RTN4 and RNT1 in human**

| Accession 5'EST<br>Accession 3'EST <sup>1</sup> | Zebrafish LN54<br>LG | Zebrafish LN54<br>Marker Symbol | Human<br>Chromosom | Human<br>Position         | Human Accession       | Description                                                                                                  |
|-------------------------------------------------|----------------------|---------------------------------|--------------------|---------------------------|-----------------------|--------------------------------------------------------------------------------------------------------------|
| AW078165                                        | 13                   | fe25d09                         | 11                 | 11p13 / 34,140 K          | NP_005889             | M11S1 membrane component, chromosome 11, surface marker 1                                                    |
| AW059113                                        | 13                   |                                 | 11                 | 11p13 / 34,140 K          | NP_005889             | M11S1 membrane component, chromosome 11, surface marker 1                                                    |
| AI477555                                        | 13                   | fb58g07                         | 10                 | 10q21-q22 / 73,490 K      | NP_002769             | PSAP prosaposin (variant Gaucher disease and variant metachromatic leukodystrophy)                           |
| AI477669                                        | 13                   |                                 |                    |                           | no significant result |                                                                                                              |
| AI601645                                        | 13                   | fc02e11                         | 2                  | 2p13-p14 / 66,680 K       | NP_002389             | MEIS1 Meis1, myeloid ecotropic viral integration site 1 homolog (mouse)                                      |
| AI588472                                        | 13                   |                                 | 2                  | 2p13-p14 / 66,680 K       | NP_002389             | MEIS1 Meis1, myeloid ecotropic viral integration site 1 homolog (mouse)                                      |
| AI601614                                        | 13                   | fc02b11                         | 6                  | 6p21.1 / 43,170 K         | AAH02879              | PARC p53-associated parkin-like cytoplasmic protein                                                          |
| AI588448                                        | 13                   |                                 |                    |                           | no significant result |                                                                                                              |
| AI629244                                        | 13                   | fc10c06                         | 6                  | 6q27 / 167,189 K          | NP_003721             | RNASE6PL ribonuclease 6 precursor                                                                            |
| AI601360                                        | 13                   |                                 |                    |                           | no significant result |                                                                                                              |
| AI626149                                        | 13                   | fc06f04                         | 3                  | 3q23 / 143,190 K          | NP_689989             | MGC40579 hypothetical protein MGC40579                                                                       |
| AI626469                                        | 13                   |                                 |                    |                           | no significant result |                                                                                                              |
| AI626134                                        | 13                   | fc06e01                         | 2                  | 2p22.3 / 38,520 K         | AAM97342              | ARL6IP2 ADP-ribosylation-like factor 6 interacting protein 2                                                 |
| AI626460                                        | 13                   |                                 | 2                  |                           | no significant result |                                                                                                              |
| AI684783                                        | 13                   | fb83c11                         | 10                 | 10q22 / 71,530 K          | NP_542986             | COL13A1 collagen, type XIII, alpha 1                                                                         |
| AI584271                                        | 13                   |                                 |                    |                           | no significant result |                                                                                                              |
| BG985848                                        | 13                   | ibd5135                         | 2                  | 2p21 / 47,190 K           | XP_031626             | TTC7 tetratricopeptide repeat domain 7                                                                       |
| BG985849                                        | 13                   |                                 | 2                  | 2p21 / 47,190 K           | XP_031626             | TTC7 tetratricopeptide repeat domain 7                                                                       |
| BF171669                                        | 13                   | fd50d08                         | 2                  | 2p21 / 47,094 K           | NP_644908             | SDNSF multiple coagulation factor deficiency protein 2                                                       |
| AW019194                                        | 13                   |                                 | 2                  | 2p21 / 47,094 K           | NP_644908             | SDNSF multiple coagulation factor deficiency protein 2                                                       |
| AW777712                                        | 13                   | fk49e09                         | 10                 | 10q25-q26 / 121,064 K     | NP_006784             | PRDX3 peroxiredoxin 3                                                                                        |
| AW778453                                        | 13                   |                                 | 10                 | 10q25-q26 / 121,064 K     | NP_006784             | PRDX3 peroxiredoxin 3                                                                                        |
| AI722119                                        | 13                   | fd19e06                         | X                  | Xq26.1 / 127,574 K        | BAA90894              | HT011 uncharacterized hypothalamus protein HT011                                                             |
| AI722533                                        | 13                   |                                 | X                  | Xq26.1 / 127,574 K        | BAA90894              | HT011 uncharacterized hypothalamus protein HT011                                                             |
| AW133840                                        | 13                   | fi12d12                         | 1                  | 1q44 / 241,040 K          | AAH04485              | PNAS-4 CGI-146 protein                                                                                       |
| AW116199                                        | 13                   |                                 |                    |                           | no significant result |                                                                                                              |
| AI476830                                        | 13                   | fb50g11                         | 10                 | 10q22 / 76,873 K          | P45880                | VDAC2 voltage-dependent anion channel 2                                                                      |
| AI477233                                        | 13                   |                                 | 10                 | 10q22 / 76,873 K          | P45880                | VDAC2 voltage-dependent anion channel 2                                                                      |
| AI497423                                        | 13                   | fb62d04                         | 14                 | 14q32 / 101,980 K         | NP_001814             | CKB creatine kinase, brain                                                                                   |
| AI522785                                        | 13                   |                                 | 14                 |                           | no significant result |                                                                                                              |
| AI584922                                        | 13                   | fb93a09                         | 2                  | 2q13 / 113,170 K          | NP_714923             | MGC46235 hypothetical protein MGC46235                                                                       |
| AI584392                                        | 13                   |                                 |                    |                           | no significant result |                                                                                                              |
| AW116409                                        | 13                   | fi15c03                         | 10                 | 10q26 / 120,950 K         | NP_003741             | EIF3S10 eukaryotic translation initiation factor 3, subunit 10 theta, 150/170kDa                             |
| AW134149                                        | 13                   |                                 | 10                 | 10q26 / 120,950 K         | NP_003741             | EIF3S10 eukaryotic translation initiation factor 3, subunit 10 theta, 150/170kDa                             |
| AW018508                                        | 13                   | fd58h04                         | 10                 | 10q25.1 / 106,152 K       | NP_004823             | GSTTLp28 glutathione-S-transferase like; glutathione transferase omega                                       |
| AW019036                                        | 13                   |                                 |                    |                           | no significant result |                                                                                                              |
| not available                                   |                      |                                 |                    |                           |                       |                                                                                                              |
| AW116140                                        | 13                   | fi09f10                         | 2                  | 2p16.1 / 60,690 K         | NP_075044             | BCL11A B-cell CLL/lymphoma 11A (zinc finger protein)                                                         |
| AI658312                                        | 13                   | fc21e02                         | 10                 | 10q22 / 70,990 K          | NP_000179             | HK1 hexokinase 1                                                                                             |
| AI641247                                        | 13                   |                                 |                    |                           | no significant result |                                                                                                              |
| AW128798                                        | 13                   | fe37e06                         | 10                 | 10q22.1 / 70,847 K        | NP_003162             | SUPV3L1 suppressor of var1, 3-like 1 (S. cerevisiae)                                                         |
| AW128298                                        | 13                   |                                 |                    |                           | no significant result |                                                                                                              |
| not available                                   |                      |                                 |                    |                           |                       |                                                                                                              |
| AW019477                                        | 13                   | fd52b02                         | 10                 | 10pter-q25.3 / 69,960 K   | NP_071412             | MAWBP MAWD binding protein                                                                                   |
| NM_131621                                       | 13                   | bmpr1a                          | 10                 | 10q22.3 / 88,730 K        | AAH28383              | BMPRI1A bone morphogenetic protein receptor, type IA                                                         |
| AI722246                                        | 13                   | fd20h06                         | 6                  | 6q27 / 170,548 K          | NP_003185             | TBP TATA box binding protein                                                                                 |
| AI721453                                        | 13                   |                                 |                    |                           | no significant result |                                                                                                              |
| AI437278                                        | 13                   | fb39g06                         | 10                 | 10q11-q24 / 76,050 K      | AAH03568              | ADK adenosine kinase                                                                                         |
| AI444479                                        | 13                   |                                 |                    |                           | no significant result |                                                                                                              |
| BE201264                                        | 13                   | fk89a06                         | 10                 | 10q24.3 / 105,950 K       | NP_000485             | COL17A1 collagen, type XVII, alpha 1                                                                         |
| BE200663                                        | 13                   |                                 |                    |                           | no significant result |                                                                                                              |
| AI629316                                        | 13                   | fc10e09 <sup>3</sup>            | 6                  | 6q24 / 138,665 K          | NP_055135             | HEBP2 heme binding protein 2                                                                                 |
| AI601384                                        | 13                   |                                 |                    |                           | no significant result |                                                                                                              |
| NM_131281                                       | 13                   | fgf8                            | 10                 | 10q24 / 103,664 K         | NP_006110             | FGF8 fibroblast growth factor 8 (androgen-induced)                                                           |
| NM_131184                                       | 13                   | pax2a                           | 10                 | 10q22.1-q24.3 / 102,860 K | NP_000269             | PAX2 paired box gene 2                                                                                       |
| AI385024                                        | 13                   | fb14b12                         | 10                 | 10q22.2 / 71,795 K        | AAH16840              | MGC34695 hypothetical protein MGC34695                                                                       |
| AI396797                                        | 13                   |                                 | 10                 | 10q22.2 / 71,795 K        | AAH16840              | MGC34695 hypothetical protein MGC34695                                                                       |
| AW173999                                        | 13                   | fi38b10                         | 10                 | 10q22.2 / 73,997 K        | NP_060096             | DNAJB12 DnaJ (Hsp40) homolog, subfamily B, member 12                                                         |
| AW171164                                        | 13                   |                                 |                    |                           | no significant result |                                                                                                              |
| AW174378                                        | 13                   | fi42e02                         | 10                 | 10q24.32 / 104,319 K      | CAC08403              | MGC2491 hypothetical protein MGC2491                                                                         |
| AW171502                                        | 13                   |                                 |                    |                           | no significant result |                                                                                                              |
| AI416105                                        | 13                   | fb18a04                         | 14                 | 14q / 33,172 K            | NP_068733             | CFL2 cofilin 2 (muscle)                                                                                      |
| AI397450                                        | 13                   |                                 | 14                 | 14q / 33,172 K            | NP_068733             | CFL2 cofilin 2 (muscle)                                                                                      |
| BF717718                                        | 13                   | fd50h11                         | 14                 | 14q32.12-q32.13 / 91,27 K | AAH23021              | GOLGA5 golgi autoantigen, golgin subfamily a, 5                                                              |
| AW019226                                        | 13                   |                                 | 14                 | 14q32.12-q32.13 / 91,27 K | AAH23021              | GOLGA5 golgi autoantigen, golgin subfamily a, 5                                                              |
| AI331561                                        | 13                   | fa94c12                         | 14                 | 14q23.1 / 59,490 K        | NP_722518             | SLC38A6 solute carrier family 38, member 6                                                                   |
| AI332252                                        | 13                   |                                 |                    |                           | no significant result |                                                                                                              |
| AW127891                                        | 13                   | fi04d12                         | 2                  | 2p23.2 / 32,130 K         | NP_057039             | CGI-27 C21orf19-like protein                                                                                 |
| AW115868                                        | 13                   |                                 | 2                  |                           | no significant result |                                                                                                              |
| AW115968                                        | 13                   | fi05f05                         | 1                  | 1q32.3-q41 / 206,652 K    | NP_055203             | DJ434O14.5 novel putative protein similar to YIL091C yeast hypothetical 84 kD protein from SGA1-KTR7         |
| AW127998                                        | 13                   |                                 | 1                  | 1q32.3-q41 / 206,652 K    | NP_055203             | DJ434O14.5 novel putative protein similar to YIL091C yeast hypothetical 84 kD protein from SGA1-KTR7         |
| AI416084                                        | 13                   | fb33g03                         | 15                 | 15q14 / 39,320 K          | NP_055953             | KIAA0252 KIAA0252 protein                                                                                    |
| AI437443                                        | 13                   |                                 |                    |                           | no significant result |                                                                                                              |
| AI658310                                        | 13                   | fc21d12                         | 6                  | 6q21 / 107,361 K          | NP_057571             | HSPC230 HSPC230 gene                                                                                         |
| AI641245                                        | 13                   |                                 |                    |                           | no significant result |                                                                                                              |
| AI545712                                        | 13                   | fb75d02                         | 20                 | 20p11 / 14,259 K          | NP_037413             | FLRT3 fibronectin leucine rich transmembrane protein 3                                                       |
| AI544469                                        | 13                   |                                 |                    |                           | no significant result |                                                                                                              |
| not available                                   |                      |                                 |                    |                           |                       |                                                                                                              |
| AI959634                                        | 13                   | fd12b09                         | 13                 | 13q12.2 / 26,947 K        | NP_690876             | MTIF3 mitochondrial translational initiation factor 3                                                        |
| AI331318                                        | 13                   | fa98g05                         | 14                 | 14q32.1 / 91,180 K        | Q99538                | LGMN legumain                                                                                                |
| AI331432                                        | 13                   |                                 |                    |                           | no significant result |                                                                                                              |
| AI331273                                        | 13                   | fa97c03                         | 14                 | 14q22.2 / 52,939 K        | NP_004115             | GMFB glia maturation factor, beta                                                                            |
| AI332203                                        | 13                   |                                 |                    |                           | no significant result |                                                                                                              |
| AI558679                                        | 13                   | fb79b10 / btaf1                 | 10                 | 10q22-q23 / 93,870 K      | NP_003963             | BTA1 BTAF1 RNA polymerase II, B-TFIIID transcription factor-associated, 170kDa (Mot1 homolog, S. cerevisiae) |
| AI558448                                        | 13                   |                                 |                    |                           | no significant result |                                                                                                              |
| AI721792                                        | 13                   | fd16d11                         | 6                  | 6p21 / ???                | CAC01626              | BTBD9 BTB (POZ) domain containing 9                                                                          |
| AI666911                                        | 13                   |                                 |                    |                           | no significant result |                                                                                                              |
| AI476860                                        | 13                   | fb51h12                         | 1                  | 1p34.3 / 32,272 K         | BAB13825              | FLJ10276 hypothetical protein FLJ10276                                                                       |
| AI477319                                        | 13                   |                                 |                    |                           | no significant result |                                                                                                              |
| Accession 5'EST<br>Accession 3'EST <sup>1</sup> | Zebrafish T 51<br>LG | Zebrafish T 51 Marker<br>Symbol | Human<br>Chromosom | Human<br>Position         | Human Accession       | Description                                                                                                  |
| AW174924                                        | 13                   | fi30c07                         | 10                 | 10q21 / 70,622 K          | NP_004719             | DDX21 DEAD/H (Asp-Glu-Ala-Asp/His) box polypeptide 21                                                        |
| AW174924                                        | 13                   |                                 | 10                 | 10q21 / 70,622 K          | NP_004719             | DDX21 DEAD/H (Asp-Glu-Ala-Asp/His) box polypeptide 21                                                        |
| AI331027                                        | 13                   | fb04e08                         | 1                  | 1q42.1 / 220,500 K        | NP_005417             | TP53BP2 tumor protein p53 binding protein, 2                                                                 |
| not available                                   | 13                   | rtn6 <sup>2</sup>               | 2                  | 2p13-p14                  |                       | RTN4 reticulon 4                                                                                             |
| BI896341                                        | 13                   | fc45e02                         | 6                  | 6q23.3 / 137,749 K        | NP_786923             | OLIG3 oligodendrocyte transcription factor 3                                                                 |
| AI793378                                        | 13                   |                                 |                    |                           | no significant result |                                                                                                              |

\* Woods et. al. 2000

**Supplementary Table 1K: Mapping data for the analysis of conserved syntenies between rtn8 in zebrafish and RTN2 in human**

| Accession 5'EST<br>Accession 3'EST <sup>1</sup> | Zebrafish LN54<br>LG | Zebrafish LN54<br>Marker Symbol | Human<br>Chromosome | Human<br>Position    | Human Accession | Description                                                                                       |
|-------------------------------------------------|----------------------|---------------------------------|---------------------|----------------------|-----------------|---------------------------------------------------------------------------------------------------|
| AI416271                                        | 21                   | tb18g12                         | 10                  | 10q11.21 / ???       | NP_055568       | BMS1L BMS1-like, ribosome assembly protein (yeast)                                                |
| AI522358                                        | 21                   |                                 |                     |                      |                 | no significant result                                                                             |
| BE016964                                        | 21                   | tk71g05                         | 4                   | 4q21.22 / 78,441 K   | NP_006826       | CCN1 cyclin 1                                                                                     |
| BE018321                                        | 21                   |                                 |                     | 4q21.22 / 78,441 K   | NP_006826       | CCN1 cyclin 1                                                                                     |
| BE556775                                        | 21                   | tk65d02                         | 9                   | 9q34.13 / 125,023 K  | BAA11486        | KIAA0169                                                                                          |
| BE201579                                        | 21                   |                                 | 9                   | 9q34.13 / 125,023 K  | BAA11486        | KIAA0169                                                                                          |
| BE016557                                        | 21                   | tk65b10                         | 9                   | 9q34 / 133,834 K     | NP_057118       | MRPS2 mitochondrial ribosomal protein S2                                                          |
| BE016589                                        | 21                   |                                 | 9                   | 9q34 / 133,834 K     | NP_057118       | MRPS2 mitochondrial ribosomal protein S2                                                          |
| BE556816                                        | 21                   | tk91a03                         | 4                   | 4q21.22 / 78,541 K   | AAH32518        | CNNG2 cyclin G2                                                                                   |
| BE200769                                        | 21                   |                                 | 4                   | 4q21.22 / 78,541 K   | AAH32518        | CNNG2 cyclin G2                                                                                   |
| not available                                   |                      |                                 |                     |                      |                 |                                                                                                   |
| AA658637                                        | 21                   | tk65b05                         | 4                   | 4q21.22 / 78,276 K   | XP_233687       | hypothetical LOC345079                                                                            |
| AF003943                                        | 21                   | celip                           | 9                   | 9q34.3 / 131,218 K   | AAB35488        | CEL carboxyl ester lipase (bile salt-stimulated lipase)                                           |
| not available                                   |                      |                                 |                     |                      |                 |                                                                                                   |
| AA605859                                        | 21                   | tk20e05                         | 9                   | 9q33-q34 / 126,730 K | AAB41498        | SPTAN1 spectrin, alpha, non-erythrocytic 1 (alpha-fodrin)                                         |
| NM_131112                                       | 21                   | pou5f1/spa                      | 6                   | 6p21.31 / 31,239 K   | NM_131112       | POU5F1 POU domain, class 5, transcription factor 1                                                |
| AI588748                                        | 21                   | tk98h11                         | 12                  | 12p24.33 / 130,897 K | AAD21042        | PUS1 pseudouridylyl synthase 1                                                                    |
| AI588293                                        | 21                   |                                 | 12                  | 12p24.33 / 130,897 K | AAD21042        | PUS1 pseudouridylyl synthase 1                                                                    |
| AI524462                                        | 21                   | tk22b05                         | 2                   | 2q21.2 / 131,017 K   | BAH32556        | FLJ20297 hypothetical protein FLJ20297                                                            |
| AI397441                                        | 21                   |                                 |                     |                      |                 | no significant result                                                                             |
| AI397201                                        | 21                   | tk06a05                         | 12                  | 12p24 / 109,346 K    | NP_057310       | VPS29 vacuolar protein sorting 29 (yeast)                                                         |
| AI385089                                        | 21                   |                                 | 12                  | 12p24 / 109,346 K    | NP_057310       | VPS29 vacuolar protein sorting 29 (yeast)                                                         |
| NM_131758                                       | 21                   | spb72 *                         | 9                   | 9q34.1 / 119,493 K   | NM_004099       | STOM stomatin                                                                                     |
| AI794078                                        | 21                   | tk38b04                         | 9                   | 9q34 / 131,070 K     | NP_000359       | TSC1 tuberous sclerosis 1                                                                         |
| AI697138                                        | 21                   |                                 |                     |                      |                 | no significant result                                                                             |
| AI657880                                        | 21                   | tk14t10 <sup>3</sup>            | 11                  | 11q23.1 / 111,453 K  | NP_001922       | DLAT dihydrolipamide S-acetyltransferase (E2 component of pyruvate dehydrogenase complex)         |
| AI641410                                        | 21                   |                                 |                     |                      |                 | no significant result                                                                             |
| AIW128712                                       | 21                   | tk63e01                         | 11                  | 11q22.2 / 101,312 K  | AAO38749        | ANGPTL5 angiotensin-like 5                                                                        |
| AIW117142                                       | 21                   |                                 |                     | 11q22.2 / 101,312 K  | AAO38749        | ANGPTL5 angiotensin-like 5                                                                        |
| AA437303                                        | 21                   | tk30h11                         | 11                  | 11q25 / 133,520 K    | AAK27221        | JAM3 junctional adhesion molecule 3                                                               |
| AI416013                                        | 21                   |                                 |                     |                      |                 | no significant result                                                                             |
| BE016985                                        | 21                   | rm s <sup>2</sup>               | 19                  | 19q13.32 / 50,686 K  |                 | RTN2 reticulon 2                                                                                  |
| BE016345                                        | 21                   | tk12d03                         | 11                  | 11q13.3 / 73,650 K   | NP_057231       | PME-1 protein phosphatase methyltransferase-1                                                     |
| BE556794                                        | 21                   | tk6807 **                       | 11                  | 11p15.5 / 4,047 K    | AAD37491        | RRM1 ribonucleotide reductase M1 polypeptide                                                      |
| BE201598                                        | 21                   |                                 | 11                  | 11p15.5 / 4,047 K    | AAD37491        | RRM1 ribonucleotide reductase M1 polypeptide                                                      |
| AA483399                                        | 21                   | tk01c01                         | 11                  | 11q13.1 / 65,546 K   | NP_003851       | BANF1 barrier to autoneurulation factor 1                                                         |
| AA495322                                        | 21                   |                                 |                     |                      |                 | no significant result                                                                             |
| NM_131338                                       | 21                   | bf                              | 6                   | 6p21.3 / 32,021 K    | AAH04143        | BF B-factor, prosperidin                                                                          |
| AI386667                                        | 21                   | tk08e11                         | 11                  | 11q13 / 63,862 K     | NP_857635       | PRDX5 peroxiredoxin 5                                                                             |
| AI384806                                        | 21                   |                                 | 11                  | 11q13 / 63,862 K     | NP_857635       | PRDX5 peroxiredoxin 5                                                                             |
| AIW059432                                       | 21                   | tk14a07                         | 11                  | 11q13 / 62,415 K     | P08195          | SLC3A2 solute carrier family 3 (activators of dibasic and neutral amino acid transport), member 2 |
| AIW058939                                       | 21                   |                                 | 11                  | 11q13 / 62,415 K     | P08195          | SLC3A2 solute carrier family 3 (activators of dibasic and neutral amino acid transport), member 2 |

  

| Accession 5'EST<br>Accession 3'EST <sup>1</sup> | Zebrafish T 51<br>LG | Zebrafish T 51 Marker<br>Symbol | Human<br>Chromosome | Human<br>Position     | Human Accession | Description                                                                                       |
|-------------------------------------------------|----------------------|---------------------------------|---------------------|-----------------------|-----------------|---------------------------------------------------------------------------------------------------|
| not available                                   |                      |                                 |                     |                       |                 |                                                                                                   |
| AA603745                                        | 21                   | tk18D04                         | 22                  | 22q11.23 / 23,284 K   | NP_004166       | SNRPD3 small nuclear ribonucleoprotein D3 polypeptide 18kDa                                       |
| not available                                   |                      |                                 |                     |                       |                 |                                                                                                   |
| AA605859                                        | 21                   | tk20e05                         | 9                   | 9q33-q34 / 126,730 K  | AAB41498        | SPTAN1 spectrin, alpha, non-erythrocytic 1 (alpha-fodrin)                                         |
| NM_131112                                       | 21                   | pou5f1/spa                      | 6                   | 6p21.31 / 31,239 K    | NM_131112       | POU5F1 POU domain, class 5, transcription factor 1                                                |
| AIW127732                                       | 21                   | tk97b11                         | 5                   | 5p13.1 / 36,213 K     | NP_005974       | SKP2 S-phase kinase-associated protein 2 (p45)                                                    |
| AIW115560                                       | 21                   |                                 | 5                   | 5p13.1 / 36,213 K     | NP_005974       | SKP2 S-phase kinase-associated protein 2 (p45)                                                    |
| AIW174919                                       | 21                   | tk30c01 *                       | 19                  | 19q13.1 / 45,926 K    | BAA22524        | ITPKC inositol 1,4,5-trisphosphate 3-kinase C 19q13.1                                             |
| AIW154617                                       | 21                   |                                 |                     |                       |                 | no significant result                                                                             |
| AIW128712                                       | 21                   | tk63e01                         | 11                  | 11q22.2 / 101,312 K   | AAO38749        | ANGPTL5 angiotensin-like 5                                                                        |
| AIW117142                                       | 21                   |                                 |                     | 11q22.2 / 101,312 K   | AAO38749        | ANGPTL5 angiotensin-like 5                                                                        |
| not available                                   |                      |                                 |                     |                       |                 |                                                                                                   |
| AIW343662                                       | 21                   | tk47e11                         | 11                  | 11q23.3 / 116,169 K   | NP_116114       | MSG13125 hypothetical protein MGC13125                                                            |
| AI965099                                        | 21                   | tk86g11 <sup>3</sup>            | 11                  | 11q23.1 / 111,453 K   | NP_001922       | DLAT dihydrolipamide S-acetyltransferase (E2 component of pyruvate dehydrogenase complex)         |
| AI943209                                        | 21                   |                                 |                     |                       |                 | no significant result                                                                             |
| AIW153341                                       | 21                   | tk19e09                         | 11                  | 11pter-p15.5 / ???    | CAA12176        | ALG8 asparagine-linked glycosylation 8 homolog (yeast, alpha-1,3-glucosyltransferase)             |
| AIW116759                                       | 21                   |                                 | 11                  | 11pter-p15.5 / ???    | CAA12176        | ALG8 asparagine-linked glycosylation 8 homolog (yeast, alpha-1,3-glucosyltransferase)             |
| NM_131338                                       | 21                   | bf                              | 6                   | 6p21.3 / 32,021 K     | AAH04143        | BF B-factor, prosperidin                                                                          |
| AI386667                                        | 21                   | tk08e11                         | 11                  | 11q13 / 63,862 K      | NP_857635       | PRDX5 peroxiredoxin 5                                                                             |
| AI384806                                        | 21                   |                                 | 11                  | 11q13 / 63,862 K      | NP_857635       | PRDX5 peroxiredoxin 5                                                                             |
| AI497216                                        | 21                   | tk63b04 *                       | 15                  | 15q22-qter / 72,761 K | AAH35738        | CYP1A2 cytochrome P450, family 1, subfamily A, polypeptide 2                                      |
| AI497522                                        | 21                   |                                 |                     |                       |                 | no significant result                                                                             |
| AI584662                                        | 21                   | tk81g12                         | 11                  | 11q12.3 / 62,362 K    | NP_003155       | STX5A syntaxin 5A                                                                                 |
| AI545474                                        | 21                   |                                 |                     |                       |                 | no significant result                                                                             |
| AI626218                                        | 21                   |                                 |                     |                       |                 | no significant result                                                                             |
| AI601826                                        | 21                   | tk12d06 *                       | 11                  | 11q12-q13 / 62,431 K  | NP_006353       | NXF1 nuclear RNA export factor 1                                                                  |
| AI722645                                        | 21                   | tk29q12                         | 5                   | 5q31.3 / 139,074 K    | NP_067547       | HSPC195 hypothetical protein HSPC195                                                              |
| AI721597                                        | 21                   |                                 |                     |                       |                 | no significant result                                                                             |
| AI722697                                        | 21                   | tk30d10                         | 18                  | 18 B2 / 36,914 K      | NP_653324       | 2610510D14RIKEN cDNA 2610510D14 gene                                                              |
| AI721642                                        | 21                   |                                 |                     |                       |                 | no significant result                                                                             |
| AIW059432                                       | 21                   | tk14a07                         | 11                  | 11q13 / 62,415 K      | P08195          | SLC3A2 solute carrier family 3 (activators of dibasic and neutral amino acid transport), member 2 |
| AIW058939                                       | 21                   |                                 | 11                  | 11q13 / 62,415 K      | P08195          | SLC3A2 solute carrier family 3 (activators of dibasic and neutral amino acid transport), member 2 |
| AIW059432                                       | 21                   |                                 |                     |                       |                 |                                                                                                   |
| NM_131455                                       | 21                   | rm1 *                           | 11                  | 11p15.5 / 4,047 K     | AAD37491        | RRM1 ribonucleotide reductase M1 polypeptide                                                      |
|                                                 | 21                   | w10493                          | 5                   | 5q33.3 / 156,284 K    | NP_612388       | LOC191937 hypothetical protein BC009868                                                           |

<sup>1</sup> only one accession number for cloned genes

<sup>2</sup> RTN8 radiation hybrid PCR result: 0011000000000000010001110000010111010000000000001001001001000000000000000110100010101 LOD score = 11.0

<sup>3</sup> tk14t10 (LN54) and tk86g11 (T51) represent the same gene

<sup>4</sup> tk9507 (LN54) and rm1 (T51) represent the same gene

\* Woods et. al., 2000

**Supplementary Table 1L: Mapping data for the analysis of conserved syntenies between RTNs in fugu and mammals**

**(FUGRU)RTN1**

| Fugu Scaffold | Fugu Position <sup>a</sup> | Ense. Peptide ID     | Description                           | Human Chr | Human Position <sup>a</sup> | Mouse Chr | Mouse Position <sup>a</sup> | Rat Chr | Rat Position <sup>a</sup> |
|---------------|----------------------------|----------------------|---------------------------------------|-----------|-----------------------------|-----------|-----------------------------|---------|---------------------------|
| 188           | 3                          | SINFRUP00000132119.1 | AMBIGUOUS                             | 14        | 58,564                      | 12        | 67,183                      | 6       | 94,852                    |
| 188           | 16                         | SINFRUP00000132121.1 | ADP RIBOSYLATION STRUCTURE CONTAINING | 14        | 5,843                       | 12        | 67,113                      | 6       | 94,772                    |
| 188           | 31                         | SINFRUP00000132124.1 | RTN1                                  | 14        | 5,819                       | 12        | 66,867                      | 6       | 94,415                    |
| 188           | 56                         | SINFRUP00000132133.1 | KNSL7                                 | 3         | 44,809                      | 9         | 123,275                     | n.d.r.  |                           |
| 188           | 63                         | SINFRUP00000132136.1 | TACC3                                 | 4         | 1,696                       | 5         | 31,927                      | 14      | 82,754                    |
| 188           | 69                         | SINFRUP00000132138.1 | FGFRL1                                | 4         | 1,002                       | n.d.r.    |                             | n.d.r.  |                           |
| 188           | 92                         | SINFRUP00000132142.1 | Q9HCC9                                | 4         | 2,307                       | 5         | 32,517                      | 14      | 82,244                    |
| 188           | 103                        | SINFRUP00000132143.1 | AMBIGUOUS                             | n.d.r.    |                             | 5         | 32,587                      | n.d.r.  |                           |
| 188           | 104                        | SINFRUP00000132144.1 | AMBIGUOUS                             | n.d.r.    |                             | 5         | 32,587                      | n.d.r.  |                           |
| 188           | 113                        | SINFRUP00000132145.1 | MRPL35                                | 2         | 86,407                      | n.d.r.    |                             | 4       | 105,352                   |
| 188           | 117                        | SINFRUP00000132146.1 | NM_022912                             | 2         | 86,477                      | 14        | 61,006                      | 4       | 105,306                   |
| 188           | 121                        | SINFRUP00000132147.1 | NM_016079                             | 2         | 86,735                      | 18        | 6,539                       | 4       | 105,079                   |
| 188           | 126                        | SINFRUP00000132148.1 | OS94_HUMAN                            | 4         | 129,187                     | 3         | 40,583                      | 2       | 127,674                   |
| 188           | 132                        | SINFRUP00000132152.1 | STK18                                 | 4         | 129,269                     | 3         | 40,624                      | 2       | 127,719                   |
| 188           | 144                        | SINFRUP00000132155.1 | ITPK1                                 | 14        | 91,482                      | 12        | 96,587                      | 6       | 126,907                   |
| 188           | 154                        | SINFRUP00000132157.1 | C14orf130                             | 14        | 91,674                      | 12        | 96,782                      | 6       | 127,044                   |
| 188           | 162                        | SINFRUP00000132160.1 | NM_018167                             | 14        | 91,743                      | 12        | 96,847                      | 6       | 127,085                   |
| 188           | 186                        | SINFRUP00000132162.1 | AMBIGUOUS                             | n.d.r.    |                             | n.d.r.    |                             | 6       | 127,367                   |
| 188           | 192                        | SINFRUP00000132167.1 | Q9P2D8                                | 14        | 92,108                      | 12        | 97,151                      | 6       | 127,444                   |
| 188           | 212                        | SINFRUP00000132173.1 | NM_138344                             | 14        | 92,383                      | 12        | 97,331                      | 6       | 127,609                   |
| 188           | 214                        | SINFRUP00000132174.1 | ASB2                                  | 14        | 92,402                      | 12        | 97,345                      | 6       | 127,626                   |
| 188           | 225                        | SINFRUP00000132175.1 | C14orf137                             | 14        | 92,492                      | 12        | 97,41                       | 6       | 127,697                   |
| 188           | 227                        | SINFRUP00000132176.1 | DDX24                                 | 14        | 92,522                      | 12        | 97,43                       | 6       | 127,711                   |
| 188           | 231                        | SINFRUP00000132179.1 | SERPINA10                             | 14        | 92,743                      | 12        | 97,635                      | 6       | 127,941                   |
| 188           | 235                        | SINFRUP00000132183.1 | MJD                                   | 14        | 90,541                      | 12        | 95,953                      | 6       | 126,216                   |
| 188           | 244                        | SINFRUP00000132192.1 | UBR1                                  | 15        | 41,033                      | 2         | 122,547                     | 3       | 107,609                   |
| 188           | 259                        | SINFRUP00000132195.1 | AMBIGUOUS                             | n.d.r.    |                             | n.d.r.    |                             | 6       | 137,352                   |

**(FUGRU)RTN2**

| Fugu Scaffold | Fugu Position <sup>a</sup> | Ense. Peptide ID     | Description | Human Chr | Human Position <sup>a</sup> | Mouse Chr | Mouse Position <sup>a</sup> | Rat Chr | Rat Position <sup>a</sup> |
|---------------|----------------------------|----------------------|-------------|-----------|-----------------------------|-----------|-----------------------------|---------|---------------------------|
| 257           | 30                         | SINFRUP00000130858.1 | GRLF1       | 19        | 52,155                      | n.d.r.    |                             | 1       | 76,842                    |
| 257           | 67                         | SINFRUP00000130860.1 | AP2S1       | 19        | 52,039                      | 7         | 11,399                      | 1       | 77,153                    |
| 257           | 106                        | SINFRUP00000130868.1 | RTN2        | 19        | 50,686                      | 7         | 0,013                       | 1       | 78,731                    |
| 257           | 114                        | SINFRUP00000130872.1 | PPM1A       | 19        | 50,695                      | n.d.r.    |                             | 1       | 78,721                    |
| 257           | 128                        | SINFRUP00000130879.1 | PTGIR       | 19        | 51,817                      | 7         | 11,561                      | 1       | 77,313                    |
| 257           | 141                        | SINFRUP00000130883.1 | AMBIGUOUS   | 19        | 51,801                      | 7         | 11,573                      | 6       | 124,486                   |
| 257           | 141                        | SINFRUP00000130883.1 | CALM2       | 19        | 51,801                      | 7         | 11,573                      | 1       | 77,325                    |
| 257           | 141                        | SINFRUP00000130883.1 | AMBIGUOUS   | 2         | 47,37                       | 7         | 11,573                      | 1       | 77,325                    |
| 257           | 146                        | SINFRUP00000130886.1 | KCNK12      | 2         | 47,747                      | n.d.r.    |                             | 6       | 124,178                   |
| 257           | 168                        | SINFRUP00000130889.1 | GEMIN7      | 19        | 50,28                       | 7         | 14,009                      | 1       | 1,51                      |
| 257           | 210                        | SINFRUP00000130898.1 | Q8IWK3      | 19        | 50,315                      | 7         | 13,98                       | 1       | 1,527                     |
| 257           | 225                        | SINFRUP00000130901.1 | MRPL28      | 16        | 0,358                       | 17        | 24,815                      | 10      | 15,396                    |
| 257           | 231                        | SINFRUP00000130904.1 | RELB        | 19        | 50,214                      | 7         | 14,06                       | 1       | 78,998                    |
| 257           | 237                        | SINFRUP00000130907.1 | CLPTM1      | 19        | 50,169                      | 7         | 14,092                      | 1       | 79,033                    |

**(FUGRU)RTN3**

| Fugu Scaffold | Fugu Position <sup>a</sup> | Ense. Peptide ID     | Description | Human Chr | Human Position <sup>a</sup> | Mouse Chr | Mouse Position <sup>a</sup> | Rat Chr | Rat Position <sup>a</sup> |
|---------------|----------------------------|----------------------|-------------|-----------|-----------------------------|-----------|-----------------------------|---------|---------------------------|
| 346           | 11                         | SINFRUP00000140880.1 | CD99L2      | X         | 148,641                     | X         | 55,663                      | n.d.r.  |                           |
| 346           | 57                         | SINFRUP00000140896.1 | Q8N8M0      | 7         | 100,378                     | n.d.r.    |                             | n.d.r.  |                           |
| 346           | 68                         | SINFRUP00000140901.1 | NM_018978   | 11        | 124,063                     | 9         | 37,593                      | n.d.r.  |                           |
| 346           | 99                         | SINFRUP00000140908.1 | ING1L       | 4         | 185,125                     | n.d.r.    |                             | 16      | 47,789                    |
| 346           | 107                        | SINFRUP00000140913.1 | AMBIGUOUS   | n.d.r.    |                             | 7         | 115,412                     | 1       | 185,996                   |
| 346           | 109                        | SINFRUP00000140914.1 | Q9H3K6      | 16        | 29,503                      | 7         | 115,414                     | 1       | 185,999                   |
| 346           | 124                        | SINFRUP00000140875.1 | SF1 or PYGL | 11        | 64,314                      | 19        | 4,302                       | 1       | 209,311                   |
| 346           | 119                        | SINFRUP00000140917.1 | PYGM        | 11        | 64,296                      | 19        | 4,281                       | 1       | 209,332                   |
| 346           | 139                        | SINFRUP00000140921.1 | RBM4        | 11        | 66,214                      | 19        | 5,921                       | 1       | 207,521                   |
| 346           | 154                        | SINFRUP00000140925.1 | MAP4K2      | 11        | 64,339                      | 19        | 4,324                       | 1       | 209,286                   |
| 346           | 161                        | SINFRUP00000140929.1 | MEN1        | 11        | 64,35                       | 19        | 4,335                       | 1       | 209,276                   |
| 346           | 166                        | SINFRUP00000140930.1 | RTN3        | 11        | 63,263                      | 19        | 3,642                       | 1       | 210,296                   |
| 346           | 189                        | SINFRUP00000140937.1 | NM_016581   | 19        | 11,489                      | n.d.r.    |                             | 8       | 21,184                    |
| 346           | 196                        | SINFRUP00000140938.1 | MTA1L1      | 11        | 62,14                       | 19        | 8,09                        | 1       | 211,781                   |

**(FUGRU)RTN4**

| Fugu Scaffold | Fugu Position <sup>a</sup> | Ense. Peptide ID     | Description | Human Chr | Human Position <sup>a</sup> | Mouse Chr | Mouse Position <sup>a</sup> | Rat Chr | Rat Position <sup>a</sup> |
|---------------|----------------------------|----------------------|-------------|-----------|-----------------------------|-----------|-----------------------------|---------|---------------------------|
| 2616          | 3                          | SINFRUP00000127275.1 | RTN4        | 2         | 55,213                      | 11        | 29,875                      | 14      | 110,775                   |

**(FUGRU)RTN7**

| Fugu Scaffold | Fugu Position <sup>a</sup> | Ense. Peptide ID     | Description | Human Chr         | Human Position <sup>a</sup> | Mouse Chr | Mouse Position <sup>a</sup> | Rat Chr | Rat Position <sup>a</sup> |
|---------------|----------------------------|----------------------|-------------|-------------------|-----------------------------|-----------|-----------------------------|---------|---------------------------|
| 3887          | 1                          | SINFRUP00000142114.1 | RTN7        | (11) <sup>b</sup> | 63,263                      | n.d.r.    |                             | n.d.r.  |                           |
| 3887          | 3                          | SINFRUP00000142116.1 | GEMIN6      | 2                 | 38,981                      | 17        | 78,861                      | 6       | 3,128                     |

**(FUGRU)RTN8**

| Fugu Scaffold | Fugu Position <sup>a</sup> | Ense. Peptide ID     | Description       | Human Chr         | Human Position <sup>a</sup> | Mouse Chr | Mouse Position <sup>a</sup> | Rat Chr | Rat Position <sup>a</sup> |
|---------------|----------------------------|----------------------|-------------------|-------------------|-----------------------------|-----------|-----------------------------|---------|---------------------------|
| 2117          | 12                         | SINFRUP00000163874.1 | CENTD2            | 11                | 72,136                      | n.d.r.    |                             | 1       | 158,977                   |
| 2117          | 24                         |                      | RTN8 <sup>c</sup> | (19) <sup>d</sup> | 50,686                      | n.d.r.    |                             | n.d.r.  |                           |

<sup>a</sup> positions are given in kilobasepairs

<sup>b</sup> position of RTN3 on human chromosom 11 was not retrieved from ensembl Martview, but from NCBI locuslink

<sup>c</sup> RTN8 was not annoated autamically by ensemble peptide prediction and therefore did not recieve an Ense. Peptide ID

<sup>d</sup> position of RTN2 on human chromosom 19 was not retrieved from ensembl Martview, but from NCBI locuslink

n.d.r. = no data retrieved with ensembl MartView
