# Supplementary figures and images for: Analysis of the Reticulon Gene Family Demonstrates the Absence of the Neurite Growth Inhibitor Nogo-A in Fish
Source: Oxford University Press journal article supplement (doi:10.1093/molbev/msi158), 2005-04-27

A

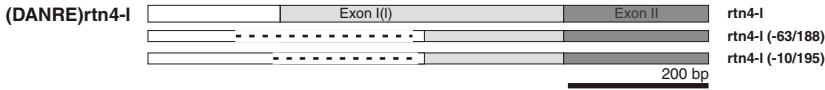

B

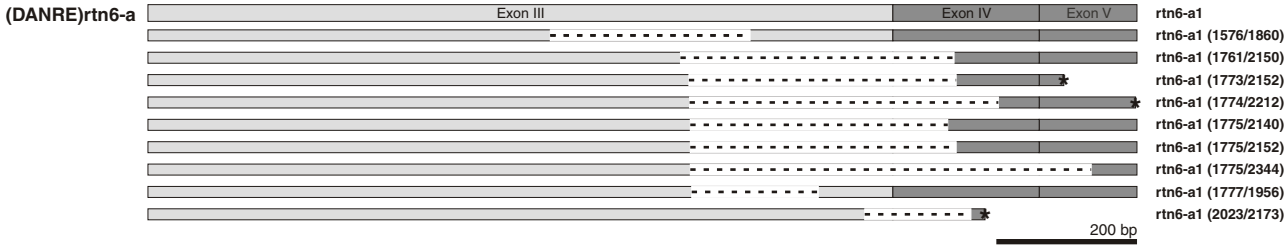

C

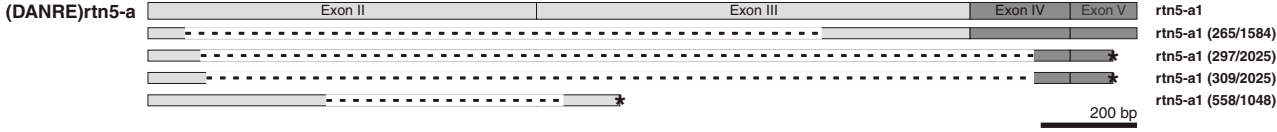

Supplement: msi158_Supplementary_Data.zip [file msi158_Supplementary_Data.zip]
